# Supplementary material for: Iridium-catalyzed asymmetric ring-opening of azabicyclic alkenes with alcohols
Source: Royal Society of Chemistry journal article supplement (doi:10.1039/c3ob40891d), 2013-01-01

# Iridium-Catalyzed Asymmetric Ring-Opening of Azabicyclic Alkenes with Alcohols

Dingqiao Yang,<sup>\*,†</sup> Jiuyun Xia,<sup>†</sup> Yuhua Long,<sup>†</sup> Zhongyi Zeng,<sup>†</sup> Xiongjun Zuo,<sup>†</sup> Sanyong Wang,<sup>‡</sup> and Chunrong Li<sup>‡</sup>

<sup>†</sup>Key Laboratory of Theoretical Chemistry of Environment, Ministry of Education; School of Chemistry and Environment, South China Normal University, Guangzhou 510006, People's Republic of China, and <sup>‡</sup>Guangdong Food Industry Institute, Guangzhou 510308, People's Republic of China.

\*Corresponding Author. E-mail: yangdq@scnu.edu.cn. Phone: +86 20 39310068. Fax: +86 20 31040403.

## Supporting Information

| Table of Contents                                                                                      | Page |
|--------------------------------------------------------------------------------------------------------|------|
| 1. General                                                                                             | S2   |
| 2. Experimental procedures and characterization data                                                   | S3   |
| 3. Crystal structure and data of 3c                                                                    | S14  |
| 4. The parties of the copies of HPLC of 2b, 3h and 3f                                                  | S23  |
| 5. Copies of <sup>1</sup> H and <sup>13</sup> C NMR spectra of 3fa, 2a–2b, 3a–3l, 4a–4c, 5a, and 6a–6d | S26  |

## 1. General

All flasks were flame-dried under a stream of nitrogen and cooled before use. Solvents and solutions were transferred with syringes and cannulae using standard inert atmosphere techniques. NMR spectra were recorded at 400 MHz using a Varian INOVA NMR spectrometer with CDCl<sub>3</sub> as reference standard ( $\delta$  7.27 ppm) for <sup>1</sup>H NMR and ( $\delta$  77.23 ppm) for <sup>13</sup>C NMR. Spectral features are tabulated in the following order: Chemical shift ( $\delta$ , ppm); number of protons; multiplicity (s-singlet, d-doublet, t-triplet, m-complex multiplet br-broad); coupling constants (*J*, Hz). IR spectra were obtained using a Nicolet DX FT-IR spectrometer as a KBr pellet or using a Perkin-Elmer Spectrum 1000 FT-IR spectrometer as a neat film on a NaCl plate. MS spectra were recorded on a Bruker esquire 6000 mass spectrometer (ESI). Optical rotations were measured on a Perkin-Elmer Model 243 Polarimeter using the sodium D line with spectra-grade CHCl<sub>3</sub> in a 1 dm cell. Melting points were taken on an XT<sub>4</sub> binocular micromelting point apparatus. HPLC analysis was performed on an Agilent 1100 Series HPLC with a Chiralcel AD column. Elemental analysis was conducted on a Thermo. Flash EA. TM. 1112. Crystal structure determination was carried out on a Bruker SMART-1000 X-ray diffraction apparatus.

**Materials:** DME was distilled from sodium benzophenone ketyl and stored. The THP, dioxane, toluene, and THF were distilled from sodium benzophenone ketyl immediately prior to use. CH<sub>3</sub>CN was distilled from calcium hydride. DMF was dried over MgSO<sub>4</sub> and stored over activated molecular sieves. The *N*-protected azabenzonorbornadienes **1a**<sup>1</sup>, **1b**<sup>1</sup>, **1c**<sup>2</sup>, **1d**<sup>2</sup> and [Ir(COD)Cl]<sub>2</sub> were prepared according to the reported procedure, respectively.<sup>3</sup>

---

1. Lautens, M.; Fagnou, K.; Zunic, V. *Org. Lett.* **2002**, *4*, 3465-3468

2. Zunic, Y.-H.; Cho, V.; Senboku, H.; Olsen, M.; Lautens, M. *J. Am. Chem. Soc.* **2006**, *128*, 6837-6846.

3. Van der Ent, A.; Onderdelinden, A. L. *Inorg. Synth.* **1973**, *14*, 92-95.

## 2. Experimental procedures and characterization data

**General procedure (I) for the asymmetric ring-opening of azabicyclic alkenes with various alcohols:** A 5.0 mL round-bottomed flask fitted with a reflux condenser was flame-dried under a stream of nitrogen and cooled to room temperature.  $[\text{Ir}(\text{COD})\text{Cl}]_2$  (3.5 mg, 2.5 mol %) and (*S*)-BINAP (6.5 mg, 5.0 mol %) were simultaneously added and followed by the addition of anhydrous tetrahydrofuran (2.0 mL). After the mixture was stirred for about 20 min, azabicyclic alkene **1b** (59.4 mg, 0.20 mmol) was added and the resulting mixture was heated to reflux. On the first sign of reflux, alcohol nucleophile (5 equiv to **1b**) was added. Then the oil bath temperature was continuously increased to 80 °C until the reaction was completed as judged by thin layer chromatography. The solvent was removed in *vacuo* and the crude mixture was purified by column chromatography on silica gel (ethyl acetate : petroleum ether = 1 : 10, v/v) to give the target product.

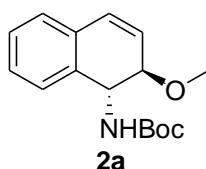

**(1*R*,2*R*)-[2-Methoxy-1,2-dihydro-naphthalen-1-yl]-carbamic acid *tert*-butyl ester (2a).**

Following the general procedure (I), **2a** was obtained as a white solid (25.0 mg, 50 %).  $R_f = 0.31$  on silica gel (ethyl acetate : petroleum ether = 1 : 6, v/v). mp 69-70 °C. The ee was determined to be 63 % using HPLC analysis on a Chiralcel OD-H column (hexane/2-propanol = 95/5, 0.5 mL/min,  $\lambda = 254$  nm); Retention times were 18.4 min (minor) and 20.7 min (major).  $[\alpha]_D^{20} = -100.5$  ( $c$  1.00,  $\text{CHCl}_3$ ). IR (film,  $\text{cm}^{-1}$ ): 3448(w), 2973(w), 2928(w), 1703(s), 1489(m), 1366(m), 1274(w), 1160(w), 910(w), 750(w), 577(w).  $^1\text{H}$  NMR (400 MHz,  $\text{CDCl}_3$ ):  $\delta$  7.35 (d,  $J = 2.4$  Hz, 1H), 7.24-7.22 (m, 2H), 7.10 (d,  $J = 2.4$  Hz, 1H), 6.59 (dd,  $J = 9.6$  Hz, 2.8Hz, 1H), 6.08 (dd,  $J = 9.6$  Hz, 4.4 Hz, 1H), 4.98 (dd,  $J = 7.6$  Hz, 4.8Hz, 1H), 4.62 (d,  $J = 8.0$  Hz, 1H), 3.99 (t,  $J = 4.8$  Hz, 1H), 3.46 (s, 3H), 1.44 (s, 9H);  $^{13}\text{C}$  NMR (100 MHz,  $\text{CDCl}_3$ ):  $\delta$  155.3, 133.9, 131.9, 130.1, 129.0, 128.3, 127.1, 126.3, 125.8, 79.7, 76.6, 56.4, 51.1, 28.4. MS (ESI) calcd for  $\text{C}_{16}\text{H}_{21}\text{NO}_3$  ( $\text{M}^+$ ): 275.15; Found: 298.30 ( $\text{M}+\text{Na}$ ) $^+$ . Anal. Calcd. for  $\text{C}_{16}\text{H}_{21}\text{NO}_3$ : C, 69.79; H, 7.69; N, 5.09. Found: C, 69.78; H, 7.71; N, 5.07.

For the asymmetric ring-opening of *N*-Boc-azabenzonorbornadiene (**1a**), *N*-Ts-azabenzonorbornadiene (**1b**), *N*-Ns-azabenzonorbornadiene (**1c**), and *N*-Bs-azabenzonorbornadiene (**1d**) with alcohols and addition of **1a–1b** with thiols to afford the corresponding new compounds **2b**, **3a–3l**, **4a–4c**, **5a**, and **6a–6d**, respectively, are as the same as

above representative procedure.

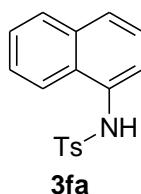

**1-Naphthyltosylamine (3fa).** **3fa** was obtained as a light-brown solid and was purified by column chromatography ( $R_f = 0.22$ , ethyl acetate : petroleum ether = 1 : 4, v/v). mp 145-147 °C.  $^1\text{H}$  NMR (400 MHz,  $\text{CDCl}_3$ )  $\delta$  7.87-7.84 (m, 1H), 7.81-7.79 (m, 1H), 7.70 (dd,  $J = 2.4, 7.2$  Hz, 1H), 7.65 (s, 1H), 7.63 (s, 1H), 7.46-7.40 (m, 2H), 7.38-7.33 (m, 2H), 7.16 (s, 1H), 7.13 (s, 1H), 7.11 (s, 1H), 2.33 (s, 3H);  $^{13}\text{C}$  NMR (100 MHz,  $\text{CDCl}_3$ )  $\delta$  143.9, 136.4, 134.3, 131.6, 129.7, 129.0, 128.5, 127.5, 127.3, 126.7, 126.4, 125.5, 122.8, 121.6, 21.6.

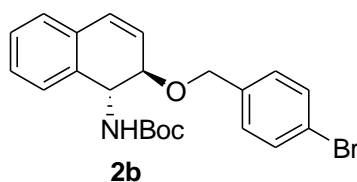

**(1R,2R)-[2-(4-Bromobenzyloxy)-1,2-dihydro-naphthalen-1-yl]-carbamic acid *tert*-butyl ester (2b).** Following the general procedure (**I**), **2b** was obtained as a white solid (27.5 mg, 32 %).  $R_f = 0.31$  on silica gel (ethyl acetate : petroleum ether = 1 : 6, v/v). mp 96-98 °C. The ee was determined to be 75 % using HPLC analysis on a Chiralcel OD-H column (hexane/2-propanol = 95/5, 0.5 mL/min,  $\lambda = 254$  nm); Retention times were 20.2 min (major) and 21.9 min (minor).  $[\alpha]_D^{20} = -143.5$  ( $c$  1.00,  $\text{CHCl}_3$ ). IR (film,  $\text{cm}^{-1}$ ): 3339(w), 2962(w), 2926(w), 1714(s), 1488(m), 1366(w), 1248(w), 1170(s), 1081(w), 1012(w), 802(w), 747(w), 647(w).  $^1\text{H}$  NMR (400 MHz,  $\text{CDCl}_3$ ):  $\delta$  7.45 (d,  $J = 7.6$  Hz, 2H), 7.38 (d,  $J = 5.6$  Hz, 1H), 7.30-7.24 (m, 4H), 7.15 (d,  $J = 6.4$  Hz, 1H), 6.62 (d,  $J = 9.6$  Hz, 1H), 6.05 (d,  $J = 9.6$  Hz, 1H), 5.09 (t,  $J = 5.6$  Hz, 1H), 4.70-4.65 (m, 3H), 4.20 (s, 1H), 1.48 (s, 9H);  $^{13}\text{C}$  NMR (100 MHz,  $\text{CDCl}_3$ ):  $\delta$  155.4, 137.5, 133.8, 132.0, 131.4, 130.2, 129.6, 128.4, 128.3, 127.1, 126.3, 125.9, 121.5, 79.8, 75.3, 69.7, 51.7, 28.4. MS (ESI) calcd for  $\text{C}_{22}\text{H}_{24}\text{BrNO}_3$  ( $\text{M}^+$ ): 429.09; Found: 452.37 ( $\text{M}+\text{Na}$ ) $^+$ . Anal. Calcd. for  $\text{C}_{22}\text{H}_{24}\text{BrNO}_3$ : C, 61.40; H, 5.62; N, 3.25. Found: C, 61.36; H, 5.60; N, 3.25.

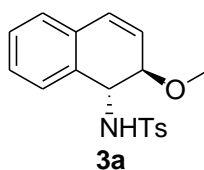

**(1R,2R)-N-(2-Methoxy-1,2-dihydro-naphthalen-1-yl)-4-methylbenzenesulfonamide (3a).**

Following the general procedure (I), **3a** was obtained as a white solid (73.0 mg, 85 %).  $R_f = 0.25$  on silica gel (ethyl acetate : petroleum ether = 1 : 6, v/v). mp 71-72 °C. The ee was determined to be 4 % using HPLC analysis on a Chiralcel OD-H column (hexane/2-propanol = 90/10, 0.5 mL/min,  $\lambda = 254$  nm); Retention times were 52.9 min (major) and 58.0 min (minor).  $[\alpha]_D^{20} = 10.6$  ( $c$  1.00,  $\text{CHCl}_3$ ). IR (film,  $\text{cm}^{-1}$ ): 3273(w), 3038(w), 2926(w), 2853(w), 1721(s), 1598(m), 1493(m), 1454(w), 1329(m), 1159(s), 1093(m), 970(m), 916(w), 813(m), 666(m), 571(m).  $^1\text{H}$  NMR (400 MHz,  $\text{CDCl}_3$ ):  $\delta$  7.75 (d,  $J = 8$  Hz, 2H), 7.30 (d,  $J = 8.8$  Hz, 2H), 7.22-7.18 (m, 1H), 7.07-7.04 (m, 2H), 6.60 (d,  $J = 8$  Hz, 1H), 6.57 (d,  $J = 9.6$  Hz, 1H), 6.03 (dd,  $J = 9.6$  Hz, 4.8 Hz, 1H), 4.68 (d,  $J = 7.6$  Hz, 1H), 4.49 (dd,  $J = 4.8$  Hz, 7.6 Hz, 1H), 3.96 (t,  $J = 4.4$  Hz, 1H), 3.25 (s, 3H), 2.45 (s, 3H);  $^{13}\text{C}$  NMR (100 MHz,  $\text{CDCl}_3$ ):  $\delta$  143.5, 137.7, 132.5, 131.7, 130.3, 129.6, 128.8, 128.3, 127.3, 125.0, 76.7, 56.5, 54.2, 21.6. MS (ESI) calcd for  $\text{C}_{18}\text{H}_{19}\text{NO}_3\text{S}$  ( $\text{M}^+$ ): 329.11; Found: 347.10 ( $\text{M}+\text{Na}$ ) $^+$ . Anal. Calcd. for  $\text{C}_{18}\text{H}_{19}\text{NO}_3\text{S}$ : C, 65.63; H, 5.81; N, 4.25; S, 9.73. Found: C, 65.66; H, 5.78; N, 4.23; S, 9.69.

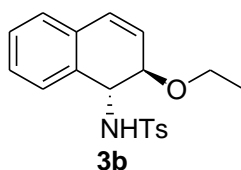

**(1R,2R)-N-(2-Ethoxy-1,2-dihydronaphthalen-1-yl)-4-methylbenzenesulfonamide (3b).**

Following the general procedure (I), **3b** was obtained as a white solid (61.7 mg, 90 %).  $R_f = 0.20$  on silica gel (ethyl acetate : petroleum ether = 1 : 5, v/v). mp 146-148 °C. The ee was determined to be 1 % using HPLC analysis on a Chiralcel OD-H column (hexane/2-propanol = 90/10, 0.5 mL/min,  $\lambda = 254$  nm); Retention times were 27.9 min (major) and 39.4 min (minor).  $[\alpha]_D^{20} = -10.2$  ( $c$  1.00,  $\text{CHCl}_3$ ). IR (film,  $\text{cm}^{-1}$ ): 3273(w), 3040(w), 2967(w), 2924(m), 2853(w), 1921(w), 1598(m), 1454(m), 1329(w), 1159(s), 1093(s), 968(m), 923(w), 813(m), 780(m), 737(m), 666(m), 547(m).  $^1\text{H}$  NMR (400 MHz,  $\text{CDCl}_3$ ):  $\delta$  7.75 (d,  $J = 8.4$  Hz, 2H), 7.30 (d,  $J = 8.8$  Hz, 2H), 7.21-7.15 (m, 1H), 7.08-7.03 (m, 2H), 6.85 (d,  $J = 7.6$  Hz, 1H), 6.54 (d,  $J = 9.6$  Hz, 1H), 6.00 (dd,  $J = 9.6$  Hz, 4.8 Hz, 1H), 4.74 (d,  $J = 7.6$  Hz, 1H), 4.49 (dd,  $J = 4.8$  Hz, 7.6 Hz, 1H), 4.04 (t,  $J = 4.8$  Hz, 1H), 3.49 (q,  $J = 7.2$  Hz, 14 Hz, 2H), 2.44 (s, 3H), 1.03 (t,  $J = 7.2$  Hz, 3H);  $^{13}\text{C}$  NMR (100 MHz,  $\text{CDCl}_3$ ):  $\delta$  143.5, 137.8, 132.7, 131.8, 129.8, 129.6, 128.7, 128.3, 128.2, 127.3, 127.2, 125.8, 75.3, 64.5, 54.7, 21.6, 15.4. MS (ESI) calcd for  $\text{C}_{19}\text{H}_{21}\text{NO}_3\text{S}$  ( $\text{M}^+$ ): 343.12; Found: 366.40 ( $\text{M}+\text{Na}$ ) $^+$ . Anal. Calcd. for  $\text{C}_{19}\text{H}_{21}\text{NO}_3\text{S}$ : C, 66.45; H, 6.16; N, 4.08; S, 9.34. Found: C, 66.49; H, 6.14; N, 4.05; S, 9.30.

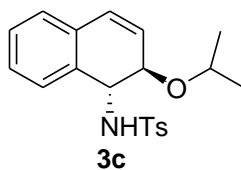

**(1R,2R)-N-(2-Isopropoxy-1,2-dihydronaphthalen-1-yl)-4-methylbenzenesulfonamide (3c).**

Following the general procedure (I), **3c** was obtained as a white solid (53.6 mg, 75 %).  $R_f = 0.16$  on silica gel (ethyl acetate : petroleum ether = 1 : 5, v/v). mp 121-123 °C. The ee was determined to be 12 % using HPLC analysis on a Chiralcel OD-H column (hexane/2-propanol = 90/10, 0.5 mL/min,  $\lambda = 254$  nm); Retention times were 22.6min (minor) and 28.3 min (major).  $[\alpha]_D^{20} = -23.5$  ( $c$  1.00,  $\text{CHCl}_3$ ). IR (film,  $\text{cm}^{-1}$ ): 3255(w), 3040(w), 2957(w), 2923(m), 2852(w), 1727(w), 1598(w), 1495(m), 1462(w), 1288(w), 1185(w), 1161(s), 968(m), 776(m), 666(m), 568(w).  $^1\text{H}$  NMR (400 MHz,  $\text{CDCl}_3$ ):  $\delta$  7.75 (d,  $J = 8.4$  Hz, 2H), 7.30 (d,  $J = 8$  Hz, 2H), 7.20-7.16 (m, 1H), 7.05-7.02 (m, 2H), 6.82 (d,  $J = 7.6$  Hz, 1H), 6.54 (d,  $J = 9.6$  Hz, 1H), 5.96 (dd,  $J = 9.6$  Hz, 4.8 Hz, 1H), 4.68 (d,  $J = 7.6$  Hz, 1H), 4.43 (dd,  $J = 4.8$  Hz, 7.6 Hz, 1H), 4.09 (t,  $J = 4.8$  Hz, 1H), 3.75-3.72 (m, 1H), 2.44 (s, 3H), 1.02 (dd,  $J = 2.4$  Hz, 8.8 Hz, 6H);  $^{13}\text{C}$  NMR (100 MHz,  $\text{CDCl}_3$ ):  $\delta$  143.5, 137.8, 132.7, 131.9, 129.7, 129.5, 128.6, 128.4, 128.2, 127.3, 127.2, 126.4, 72.8, 70.3, 55.3, 22.5, 21.6. MS (ESI) calcd for  $\text{C}_{20}\text{H}_{23}\text{NO}_3\text{S}(\text{M}^+)$ : 357.14; Found: 380.46 ( $\text{M}+\text{Na}$ ) $^+$ . Anal. Calcd. for  $\text{C}_{20}\text{H}_{23}\text{NO}_3\text{S}$ : C, 67.20; H, 6.49; N, 3.92; S, 8.97. Found: C, 67.18; H, 6.50; N, 3.93; S, 8.95.

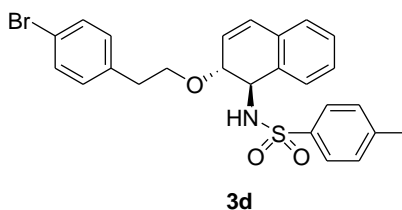

**(1R,2R)-N-(2-(4-Bromophenoxy)-1,2-dihydronaphthalen-1-yl)-4-methylbenzenesulfonamide**

**(3d).** Following the general procedure (I), **3d** was obtained as a white solid (74.5 mg, 75 %).  $R_f = 0.27$  on silica gel (ethyl acetate : petroleum ether = 1 : 4, v/v). mp 163-164 °C. The ee was determined to be 30 % using HPLC analysis on a Chiralcel OD-H column (hexane/2-propanol = 85/15, 0.5 mL/min,  $\lambda = 254$  nm); Retention times were 24.4 min (minor) and 36.3 min (major).  $[\alpha]_D^{20} = -62.7$  ( $c$  1.00,  $\text{CHCl}_3$ ). IR (film,  $\text{cm}^{-1}$ ): 3273(w), 3033(w), 2957(s), 2279(w), 1727(m), 1598(w), 1488(m), 1455(w), 1331(m), 1160(s), 1093(s), 962(w), 813(m), 666(m), 547(m).  $^1\text{H}$  NMR (400 MHz,  $\text{CDCl}_3$ ):  $\delta$  7.72 (d,  $J = 8.4$  Hz, 2H), 7.32 (d,  $J = 8.0$  Hz, 4H), 7.21 (t,  $J = 7.6$  Hz, 1H), 7.06 (d,  $J = 7.2$  Hz, 2H), 6.97 (d,  $J = 8.4$  Hz,

2H), 6.61 (d,  $J = 7.6$  Hz, 1H), 6.56 (d,  $J = 9.6$  Hz, 1H), 5.96 (dd,  $J = 4.8$  Hz, 9.6 Hz, 1H), 4.58 (d,  $J = 7.6$  Hz, 1H), 4.31 (dd,  $J = 4.0$  Hz, 7.6 Hz, 1H), 4.07 (t,  $J = 4.4$  Hz, 1H), 3.73-3.61 (m, 2H), 2.66 (t,  $J = 7.2$  Hz, 2H), 2.46 (s, 3H);  $^{13}\text{C}$  NMR (100 MHz,  $\text{CDCl}_3$ ):  $\delta$  143.6, 137.9, 137.6, 132.3, 131.7, 131.3, 130.7, 130.3, 129.7, 128.8, 128.5, 128.3, 172.3, 127.2, 125.1, 120.0, 75.3, 69.5, 54.2, 35.7, 21.6. MS (ESI) calcd for  $\text{C}_{25}\text{H}_{24}\text{BrNO}_3\text{S}$  ( $\text{M}^+$ ): 497.07; Found: 520.16 ( $\text{M}+\text{Na}$ ) $^+$ . Anal. Calcd. for  $\text{C}_{25}\text{H}_{24}\text{BrNO}_3\text{S}$ : C, 60.24; H, 4.85; N, 2.81; S, 6.43. Found: C, 60.21; H, 4.87; N, 2.82; S, 6.40.

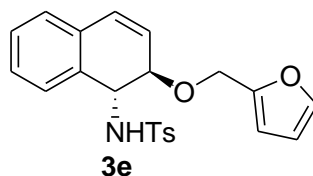

**(1R,2R)-N-(2-(Furan-2-ylmethoxy)-1,2-dihydronaphthalen-1-yl)-4-methylbenzenesulfonamide**

**(3e)**. Following the general procedure **(I)**, **3e** was obtained as a white solid (40.5 mg, 51 %).  $R_f = 0.30$  on silica gel (ethyl acetate : petroleum ether = 1 : 3, v/v). mp 123-124 °C. The ee was determined to be 94 % using HPLC analysis on a Chiralcel OD-H column (hexane/2-propanol = 85/15, 0.5 mL/min,  $\lambda = 254$  nm); Retention times were 29.1 min (minor) and 33.3 min (major).  $[\alpha]_D^{20} = -165$  ( $c$  1.00,  $\text{CHCl}_3$ ). IR (film,  $\text{cm}^{-1}$ ): 3269(w), 2926(w), 2854(w), 1715(m), 1598(w), 1503(w), 1454(m), 1331(m), 1159(s), 1069(m), 918(w), 815(m), 749(m), 665(m), 569(m).  $^1\text{H}$  NMR (400 MHz,  $\text{CDCl}_3$ ):  $\delta$  7.75 (d,  $J = 8.0$  Hz, 2H), 7.37 (s, 1H), 7.30 (d,  $J = 8.0$  Hz, 2H), 7.18 (t,  $J = 7.6$  Hz, 1H), 7.07 (d,  $J = 7.2$  Hz, 2H), 6.84 (d,  $J = 7.6$  Hz, 1H), 6.56 (d,  $J = 9.6$  Hz, 1H), 6.32 (s, 1H), 6.27 (s, 1H), 5.92 (dd,  $J = 4.8$  Hz, 9.6 Hz, 1H), 4.51-4.46 (m, 2H), 4.43 (s,  $J = 8.0$  Hz, 2H), 4.18 (s, 1H), 2.46 (s, 3H);  $^{13}\text{C}$  NMR (100 MHz,  $\text{CDCl}_3$ ):  $\delta$  151.3, 143.5, 142.9, 137.5, 132.5, 131.7, 130.2, 129.6, 128.7, 128.4, 128.3, 127.4, 125.2, 110.3, 109.8, 74.4, 62.8, 54.7, 21.6. MS (ESI) calcd for  $\text{C}_{22}\text{H}_{21}\text{NO}_4\text{S}$  ( $\text{M}^+$ ): 395.12; Found: 518.51 ( $\text{M}+\text{Na}$ ) $^+$ . Anal. Calcd. for  $\text{C}_{22}\text{H}_{21}\text{NO}_4\text{S}$ : C, 66.82; H, 5.35; N, 3.54; S, 8.11. Found: C, 66.80; H, 5.34; N, 3.55; S, 8.08.

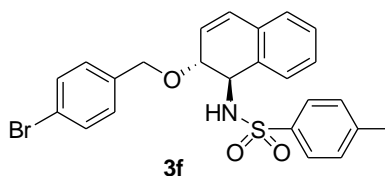

**(1R,2R)-N-(2-(4-Bromobenzyloxy)-1,2-dihydronaphthalen-1-yl)-4-methylbenzenesulfonamide**

**(3f)**. Following the general procedure **(I)**, **3f** was obtained as a white solid (53.5 mg, 55 %).  $R_f = 0.24$  on silica gel (ethyl acetate : petroleum ether = 1 : 4, v/v). mp 132-134 °C. The ee was determined to be 92 % using HPLC analysis on a Chiralcel OD-H column (hexane/2-propanol = 85/15, 0.5 mL/min,  $\lambda = 254$  nm); Retention times were 27.6 min (minor) and 38.6 min (major).  $[\alpha]_D^{20} = -175$  ( $c$  1.00,  $\text{CHCl}_3$ ).

IR (film,  $\text{cm}^{-1}$ ): 3275(w), 3034(w), 2925(w), 1721(m), 1597(w), 1487(m), 1454(w), 1330(m), 1159(s), 1093(s), 1070(s), 1011(m), 912(w), 811(m), 666(m), 570(m), 547(m).  $^1\text{H}$  NMR (400 MHz,  $\text{CDCl}_3$ ):  $\delta$  7.71 (d,  $J = 8.4$  Hz, 2H), 7.44 (d,  $J = 8.4$  Hz, 2H), 7.28 (d,  $J = 8.4$  Hz, 2H), 7.24 (t,  $J = 7.6$  Hz, 1H), 7.11 (d,  $J = 8.0$  Hz, 3H), 7.09-7.06 (m, 1H), 6.73 (d,  $J = 7.6$  Hz, 1H), 6.63 (d,  $J = 9.6$  Hz, 1H), 6.00 (dd,  $J = 4.8$  Hz, 9.6 Hz, 1H), 4.56-4.51 (m, 3H), 4.46 (t,  $J = 8.0$  Hz, 1H), 4.17 (t,  $J = 4.8$  Hz, 1H), 2.46 (s, 3H);  $^{13}\text{C}$  NMR (100 MHz,  $\text{CDCl}_3$ ):  $\delta$  143.6, 137.6, 137.2, 132.3, 131.7, 131.4, 130.5, 129.7, 129.4, 129.0, 128.9, 128.5, 172.3, 127.2, 124.9, 121.6, 74.7, 70.1, 54.4, 21.6. MS (ESI) calcd for  $\text{C}_{24}\text{H}_{22}\text{BrNO}_3\text{S}$  ( $\text{M}^+$ ): 483.05; Found: 508.43 ( $\text{M}+\text{Na}$ ) $^+$ . Anal. Calcd. for  $\text{C}_{24}\text{H}_{22}\text{BrNO}_3\text{S}$ : C, 59.51; H, 4.58; N, 2.89; S, 6.62. Found: C, 59.53; H, 4.59; N, 2.89; S, 6.60.

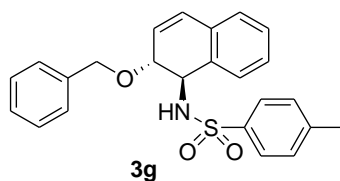

**(1R,2R)-N-(2-Benzyloxy-1,2-dihydronaphthalen-1-yl)-4-methylbenzenesulfonamide (3g).**

Following the general procedure (I), **3g** was obtained as a white solid (36.5 mg, 45 %).  $R_f = 0.25$  on silica gel (ethyl acetate : petroleum ether = 1 : 4, v/v). mp 113-114 °C. The ee was determined to be 78 % using HPLC analysis on a Chiralcel OD-H column (hexane/2-propanol = 85/15, 0.5 mL/min,  $\lambda = 254$  nm); Retention times were 26.4 min (minor) and 29.2 min (major).  $[\alpha]_D^{20} = -135$  ( $c$  1.00,  $\text{CHCl}_3$ ). IR (film,  $\text{cm}^{-1}$ ): 3280(w), 3061(w), 2920(w), 1723(m), 1598(w), 1495(m), 1454(w), 1330(s), 1160(s), 1093(s), 966(w), 918(w), 813(m), 750(w), 698(w), 666(m), 569(m).  $^1\text{H}$  NMR (400 MHz,  $\text{CDCl}_3$ ):  $\delta$  7.73 (d,  $J = 8.4$  Hz, 2H), 7.33-1.21 (m, 8H), 7.10 (d,  $J = 7.6$  Hz, 2H), 6.79 (d,  $J = 7.2$  Hz, 1H), 6.62 (d,  $J = 9.6$  Hz, 1H), 6.00 (dd,  $J = 4.8$  Hz, 9.6 Hz, 1H), 4.59-4.55 (m, 3H), 4.50 (t,  $J = 7.6$  Hz, 1H), 4.18 (t,  $J = 4.8$  Hz, 1H), 2.45 (s, 3H);  $^{13}\text{C}$  NMR (100 MHz,  $\text{CDCl}_3$ ):  $\delta$  143.5, 138.1, 137.6, 132.5, 131.8, 130.3, 129.6, 128.8, 128.5, 128.4, 127.8, 127.7, 127.3, 127.2, 125.3, 74.5, 70.9, 54.5, 21.6. MS (ESI) calcd for  $\text{C}_{24}\text{H}_{23}\text{NO}_3\text{S}$  ( $\text{M}^+$ ): 405.14; Found: 428.64 ( $\text{M}+\text{Na}$ ) $^+$ . Anal. Calcd. for  $\text{C}_{24}\text{H}_{23}\text{NO}_3\text{S}$ : C, 71.09; H, 5.72; N, 3.45; S, 7.91. Found: C, 71.12; H, 5.74; N, 3.48; S, 7.89.

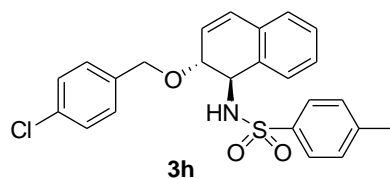

**(1R,2R)-N-(2-(4-Chlorobenzyloxy)-1,2-dihydronaphthalen-1-yl)-4-methylbenzenesulfonamide**



**(3h).** Following the general procedure (**I**), **3h** was obtained as a white solid (36.5 mg, 65 %).  $R_f = 0.22$  on silica gel (ethyl acetate : petroleum ether = 1 : 4, v/v). mp 133-134 °C. The ee was determined to be 73 % using HPLC analysis on a Chiralcel OD-H column (hexane/2-propanol = 85/15, 0.5 mL/min,  $\lambda = 254$  nm); Retention times were 25.4 min (minor) and 33.9 min (major).  $[\alpha]_D^{20} = -135$  ( $c$  1.00,  $\text{CHCl}_3$ ). IR (film,  $\text{cm}^{-1}$ ): 3281(w), 2925(w), 1492(w), 1455(w), 1328(m), 1454(w), 1330(s), 1159(s), 1093(s), 1014(w), 812(m), 667(w), 666(m), 569(m).  $^1\text{H}$  NMR (400 MHz,  $\text{CDCl}_3$ ):  $\delta$  7.72 (d,  $J = 7.2$  Hz, 2H), 7.30-7.27 (m, 4H), 7.24 (t,  $J = 7.2$  Hz, 1H), 7.17 (d,  $J = 8.0$  Hz, 2H), 7.12-7.08 (m, 2H), 6.73 (d,  $J = 7.6$  Hz, 1H), 6.62 (d,  $J = 9.6$  Hz, 1H), 6.00 (dd,  $J = 4.8$  Hz, 9.6 Hz, 1H), 4.53 (d,  $J = 7.6$  Hz, 2H), 4.49 (t,  $J = 7.6$  Hz, 1H), 4.17 (t,  $J = 7.6$  Hz, 1H), 2.46 (s, 3H), 2.18 (s, 1H);  $^{13}\text{C}$  NMR (100 MHz,  $\text{CDCl}_3$ ):  $\delta$  143.6, 137.6, 136.7, 133.4, 132.3, 131.7, 130.5, 129.7, 129.1, 128.9, 128.4, 128.5, 127.3, 127.2, 124.9, 74.7, 70.1, 54.4, 21.6. MS (ESI) calcd for  $\text{C}_{24}\text{H}_{22}\text{NO}_3\text{ClS}$  ( $\text{M}^+$ ): 439.10; Found: 462.58 ( $\text{M}+\text{Na}$ ) $^+$ . Anal. Calcd. for  $\text{C}_{24}\text{H}_{22}\text{NO}_3\text{ClS}$ : C, 65.52; H, 5.04; N, 3.18; S, 7.29. Found: C, 65.53; H, 5.02; N, 3.19; S, 7.26.

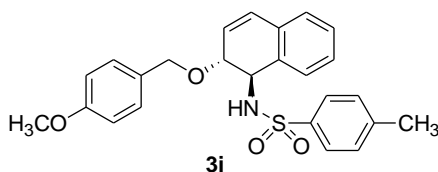

**(1R,2R)-N-(2-(4-Methoxybenzyloxy)-1,2-dihydronaphthalen-1-yl)-4-methylbenzenesulfonamide**

**(3i).** Following the general procedure (**I**), **3i** was obtained as a white solid (27.9 mg, 32 %).  $R_f = 0.15$  on silica gel (ethyl acetate : petroleum ether = 1 : 5, v/v). mp 83-84 °C. The ee was determined to be 82 % using HPLC analysis on a Chiralcel OD-H column (hexane/2-propanol = 85/15, 0.5 mL/min,  $\lambda = 254$  nm); Retention times were 37.6 min (minor) and 40.8 min (major).  $[\alpha]_D^{20} = -143$  ( $c$  1.00,  $\text{CHCl}_3$ ). IR (film,  $\text{cm}^{-1}$ ): 3276(w), 3035(w), 2925(w), 1724(w), 1612(w), 1514(w), 1454(w), 1329(m), 1248(m), 1159(s), 1094(m), 1034(m), 914(w), 8125(m), 664(m), 566(m).  $^1\text{H}$  NMR (400 MHz,  $\text{CDCl}_3$ ):  $\delta$  7.73 (d,  $J = 8.0$  Hz, 2H), 7.28 (d,  $J = 9.6$  Hz, 2H), 7.22 (t,  $J = 7.2$  Hz, 1H), 7.16 (d,  $J = 8.4$  Hz, 2H), 7.08 (d,  $J = 8.8$  Hz, 2H), 6.85 (d,  $J = 8.4$  Hz, 2H), 6.76 (d,  $J = 7.2$  Hz, 1H), 6.59 (d,  $J = 9.6$  Hz, 1H), 5.96 (dd,  $J = 4.4$  Hz, 9.6 Hz, 1H), 4.55-4.51 (m, 1H), 4.50-4.47 (m, 3H), 4.16 (s, 1H), 3.82 (s, 3H), 2.46 (s, 3H);  $^{13}\text{C}$  NMR (100 MHz,  $\text{CDCl}_3$ ):  $\delta$  159.2, 143.5, 137.7, 132.5, 131.8, 130.2, 130.1, 129.7, 129.5, 128.8, 128.5, 128.3, 127.3, 125.4, 113.7, 74.0, 70.6, 55.3, 54.4, 21.6. MS (ESI) calcd for  $\text{C}_{25}\text{H}_{25}\text{NO}_4\text{S}$  ( $\text{M}^+$ ): 435.15; Found: 458.45 ( $\text{M}+\text{Na}$ ) $^+$ . Anal. Calcd. for  $\text{C}_{25}\text{H}_{25}\text{NO}_4\text{S}$ : C, 68.94; H, 5.79; N, 3.22; S, 7.36. Found: C, 68.93; H, 5.77; N, 3.19; S, 7.34.

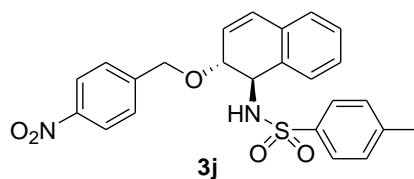

**(1R,2R)-N-(2-(4-Nitrobenzyloxy)-1,2-dihydronaphthalen-1-yl)-4-methylbenzenesulfonamide**

**(3j).** Following the general procedure **(I)**, **3j** was obtained as a white solid (54.1 mg, 60 %).  $R_f = 0.12$  on silica gel (ethyl acetate : petroleum ether = 1 : 4, v/v). mp 190-191 °C. The ee was determined to be 60 % using HPLC analysis on a Chiralcel OD-H column (hexane/2-propanol = 90/10, 1.0 mL/min,  $\lambda = 254$  nm); Retention times were 47.3 min (minor) and 54.6 min (major).  $[\alpha]_D^{20} = -121$  ( $c$  1.00,  $\text{CHCl}_3$ ). IR (film,  $\text{cm}^{-1}$ ): 3282(w), 3045(w), 2925(w), 2854(w), 1958(w), 1519(w), 1397(w), 1344(s), 1161(s), 1092(m), 961(w), 814(m), 775(m), 667(m), 569(m).  $^1\text{H}$  NMR (400 MHz,  $\text{CDCl}_3$ ):  $\delta$  7.72 (d,  $J = 8.4$  Hz, 2H), 7.42 (d,  $J = 8.4$  Hz, 2H), 7.30-7.27 (m, 3H), 7.25 (t,  $J = 7.6$  Hz, 1H), 7.12 (d,  $J = 8.0$  Hz, 3H), 6.70 (d,  $J = 7.6$  Hz, 1H), 6.63 (d,  $J = 9.6$  Hz, 1H), 5.98 (dd,  $J = 4.8$  Hz, 9.6 Hz, 1H), 4.55-4.52 (m, 3H), 4.45 (t,  $J = 8.0$  Hz, 1H), 4.16 (t,  $J = 4.8$  Hz, 1H), 2.45 (s, 3H);  $^{13}\text{C}$  NMR (100 MHz,  $\text{CDCl}_3$ ):  $\delta$  145.6, 137.6, 136.7, 133.4, 132.3, 131.7, 130.5, 129.7, 129.1, 128.9, 128.4, 128.5, 127.3, 127.2, 124.9, 79.2, 71.9, 54.4, 24.3. MS (ESI) calcd for  $\text{C}_{24}\text{H}_{22}\text{N}_2\text{O}_5\text{S}$  ( $\text{M}^+$ ): 450.13; Found: 473.52 ( $\text{M}+\text{Na}$ ) $^+$ . Anal. Calcd. for  $\text{C}_{24}\text{H}_{22}\text{N}_2\text{O}_5\text{S}$ : C, 63.98; H, 4.92; N, 6.22; S, 7.12. Found: C, 63.95; H, 4.94; N, 6.19; S, 7.08.

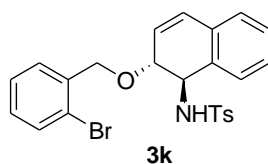

**(1R,2R)-N-(2-(2-Bromobenzyloxy)-1,2-dihydronaphthalen-1-yl)-4-methylbenzenesulfonamide**

**(3k).** Following the general procedure **(I)**, **3k** was obtained as a white solid (40.5 mg, 75 %).  $R_f = 0.10$  on silica gel (ethyl acetate : petroleum ether = 1 : 8, v/v). mp 134-135 °C. The ee was determined to be 12 % using HPLC analysis on a Chiralcel OD-H column (hexane/2-propanol = 85/15, 0.5 mL/min,  $\lambda = 254$  nm); Retention times were 46.7 min (minor) and 50.3 min (major).  $[\alpha]_D^{20} = -23$  ( $c$  1.00,  $\text{CHCl}_3$ ). IR (film,  $\text{cm}^{-1}$ ): 3284(w), 3059(w), 2924(w), 1597(w), 1491(w), 1444(m), 1332(m), 1159(s), 1094(m), 928(w), 812(w), 664(m), 547(m).  $^1\text{H}$  NMR (400 MHz,  $\text{CDCl}_3$ ):  $\delta$  7.74 (d,  $J = 8.4$  Hz, 2H), 7.51 (d,  $J = 8.0$  Hz, 1H), 7.35(d,  $J = 4.8$  Hz, 1H), 7.26-7.21 (m, 4H), 7.16-7.09 (m, 3H), 6.92 (d,  $J = 7.6$  Hz, 1H), 6.61 (d,  $J = 9.6$  Hz, 1H), 6.05 (dd,  $J = 4.8$  Hz, 9.6 Hz, 1H), 4.62 (s, 1H), 4.56 (s, 2H), 4.23 (t,  $J = 4.0$  Hz, 1H), 2.40 (s, 3H), 2.34 (s, 1H);  $^{13}\text{C}$  NMR (100 MHz,  $\text{CDCl}_3$ ):  $\delta$  143.3, 137.5, 137.3, 132.7, 132.4,

131.8, 130.4, 129.6, 129.4, 129.0, 128.7, 128.4, 128.3, 127.3, 127.2, 125.0, 122.8, 121.4, 75.5, 70.2, 54.7, 21.6. MS (ESI) calcd for  $C_{24}H_{22}BrNO_3S$  ( $M^+$ ): 485.05; Found: 506.33 ( $M+Na$ )<sup>+</sup>. Anal. Calcd. for  $C_{24}H_{22}NBrO_3S$ : C, 59.51; H, 4.58; N, 2.89; S, 6.62. Found: C, 59.54; H, 4.55; N, 2.88; S, 6.58.

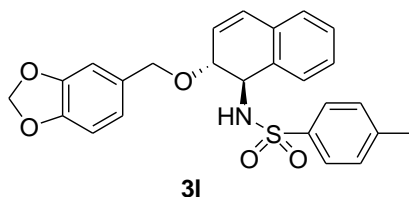

**(1R,2R)-N-(2-(Benzo[d][1,3]dioxol-5-ylmethoxy)-1,2-dihydronaphthalen-1-yl)-4-methylbenzenesulfonamide (3l).** Following the general procedure (I), **3l** was obtained as a white solid (72.6 mg, 45 %).  $R_f = 0.15$  on silica gel (ethyl acetate : petroleum ether = 1 : 5, v/v). mp 63-64 °C. The ee was determined to be 88 % using HPLC analysis on a Chiralcel OD-H column (hexane/2-propanol = 85/15, 0.5 mL/min,  $\lambda = 254$  nm); Retention times were 26.1 min (minor) and 35.5 min (major).  $[\alpha]_D^{20} = -128$  ( $c$  1.00,  $CHCl_3$ ). IR (film,  $cm^{-1}$ ): 3268(w), 3059(w), 2957(w), 2924(w), 1597(w), 1454(w), 1329(m), 1161(s), 1093(s), 967(w), 916(w), 813(m), 752(m), 665(m), 548(m).  $^1H$  NMR (400 MHz,  $CDCl_3$ ):  $\delta$  7.73 (d,  $J = 8.0$  Hz, 2H), 7.30 (d,  $J = 8.0$  Hz, 2H), 7.21 (t,  $J = 7.6$  Hz, 1H), 7.08 (d,  $J = 7.6$  Hz, 2H), 6.77-6.73 (m, 4H), 6.59 (d,  $J = 9.6$  Hz, 1H), 5.98 (d,  $J = 4.4$  Hz, 1H), 5.95 (s, 2H), 4.52 (s, 2H), 4.43 (s, 2H), 4.14 (s, 1H), 2.43 (s, 3H);  $^{13}C$  NMR (100 MHz,  $CDCl_3$ ):  $\delta$  143.7, 143.2, 139.6, 133.7, 128.5, 127.9, 127.8, 126.4, 125.7, 124.9, 124.5, 124.4, 123.4, 123.3, 121.3, 117.6, 104.7, 104.1, 97.0, 70.1, 66.8, 50.5, 17.7. MS (ESI) calcd for  $C_{25}H_{23}NO_5S$  ( $M^+$ ): 449.13; Found: 472.33 ( $M+Na$ )<sup>+</sup>. Anal. Calcd. for  $C_{25}H_{23}NO_5S$ : C, 66.80; H, 5.16; N, 3.12; S, 7.13. Found: C, 66.81; H, 5.15; N, 3.12; S, 7.16.

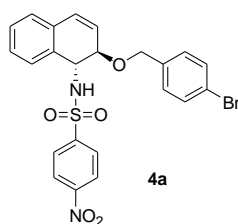

**(1R,2R)-N-(2-(4-Bromobenzyloxy)-1,2-dihydronaphthalen-1-yl)-4-nitrobenzenesulfonamide (4a).** Following the general procedure (I), **4a** was obtained as a white solid (77.3 mg, 75 %).  $R_f = 0.18$  on silica gel (ethyl acetate : petroleum ether = 1 : 4, v/v). mp 166-167 °C. The ee was determined to be 10 % using HPLC analysis on a Chiralcel OD-H column (hexane/2-propanol = 80/20, 1.0 mL/min,  $\lambda = 254$  nm); Retention times were 33.5 min (minor) and 50.1 min (major).  $[\alpha]_D^{20} = -19$  ( $c$  1.00,  $CHCl_3$ ). IR (film,  $cm^{-1}$ ): 3274(w), 3059(w), 2925(w), 2854(m), 1724(m), 1605(w), 1530(s), 1487(w), 1455(w), 1348(s), 1288(m), 1164(m), 1092(m), 1073(m), 853(w), 811(w), 736(m), 615(m), 503(m).  $^1H$  NMR

(400 MHz, CDCl<sub>3</sub>): δ 8.21 (d, *J* = 8.4 Hz, 2H), 7.94 (d, *J* = 8.4 Hz, 2H), 7.42 (d, *J* = 8.4 Hz, 2H), 7.26 (s, 1H), 7.15-7.11 (m, 2H), 7.05 (d, *J* = 8.0 Hz, 2H), 6.97 (d, *J* = 7.6 Hz, 1H), 6.60 (d, *J* = 9.6 Hz, 1H), 5.99 (dd, *J* = 4.0 Hz, 3.6 Hz, 1H), 4.96 (d, *J* = 7.6 Hz, 1H), 4.65 (t, *J* = 7.2 Hz, 1H), 4.52 (d, *J* = 8.0 Hz, 1H), 4.36 (d, *J* = 9.6 Hz, 1H), 4.14 (t, *J* = 8.4 Hz, 1H); <sup>13</sup>C NMR (100 MHz, CDCl<sub>3</sub>): δ 149.8, 146.5, 136.7, 132.1, 131.9, 131.5, 130.3, 129.3, 129.1, 128.5, 128.2, 127.7, 127.4, 125.1, 124.1, 121.9, 75.5, 70.2, 55.8. MS (ESI) calcd for C<sub>23</sub>H<sub>19</sub>N<sub>2</sub>O<sub>5</sub>BrS (M<sup>+</sup>): 514.02; Found: 538.34 (M+Na)<sup>+</sup>. Anal. Calcd. for C<sub>23</sub>H<sub>19</sub>N<sub>2</sub>O<sub>5</sub>BrS: C, 53.60; H, 3.72; N, 5.44; S, 6.22. Found: C, 53.62; H, 3.71; N, 5.44; S, 6.19.

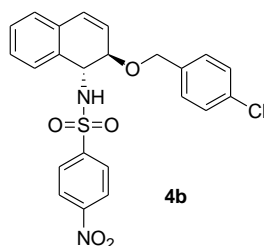

**(1R,2R)-N-(2-(4-Chlorobenzoyloxy)-1,2-dihydronaphthalen-1-yl)-4-nitrobenzenesulfonamide**

**(4b).** Following the general procedure **(I)**, **4b** was obtained as a white solid (61.1 mg, 65 %). R<sub>f</sub> = 0.18 on silica gel (ethyl acetate : petroleum ether = 1 : 4, v/v). mp 173-174 °C. The ee was determined to be 16 % using HPLC analysis on a Chiralcel OD-H column (hexane/2-propanol = 80/20, 1.0 mL/min, λ = 254 nm); Retention times were 31.0 min (minor) and 42.7 min (major). [α]<sub>D</sub><sup>20</sup> = -32 (c 1.00, CHCl<sub>3</sub>). IR (film, cm<sup>-1</sup>) 3283(w), 3104(w), 2919(w), 2852(w), 1728(w), 1605(w), 1530(s), 1492(w), 1454(w), 1348(s), 1164(s), 1091(m), 1014(w), 853(m), 813(m), 736(m), 558(m). <sup>1</sup>H NMR (400 MHz, CDCl<sub>3</sub>): δ 8.20 (d, *J* = 4.8 Hz, 2H), 7.94 (d, *J* = 8.8 Hz, 2H), 7.36-7.24 (m, 4H), 7.14-1.10 (m, 3H), 6.97 (d, *J* = 7.6 Hz, 1H), 6.60 (d, *J* = 9.6 Hz, 1H), 6.00 (dd, *J* = 9.6 Hz, 4.0 Hz, 1H), 4.85 (d, *J* = 8.4 Hz, 1H), 4.66 (t, *J* = 6.0 Hz, 1H), 4.53 (d, *J* = 12.0 Hz, 1H), 4.38 (d, *J* = 9.6 Hz, 1H), 4.15 (t, *J* = 8.4 Hz, 1H); <sup>13</sup>C NMR (100 MHz, CDCl<sub>3</sub>): δ 146.5, 136.1, 133.8, 132.1, 131.9, 130.3, 129.1, 128.9, 128.6, 128.5, 128.2, 127.7, 127.4, 125.1, 124.8, 124.1, 75.4, 70.1, 55.8. MS (ESI) calcd for C<sub>23</sub>H<sub>19</sub>N<sub>2</sub>O<sub>5</sub>ClS (M<sup>+</sup>): 470.07; Found: 493.43 (M+Na)<sup>+</sup>. Anal. Calcd. for C<sub>23</sub>H<sub>19</sub>N<sub>2</sub>O<sub>5</sub>ClS: C, 58.66; H, 4.07; N, 5.95; S, 6.81. Found: C, 58.67; H, 4.06; N, 5.94; S, 6.77.

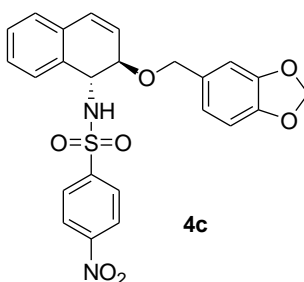

**(1*R*,2*R*)-*N*-(2-(Benzo[*d*][1,3]dioxol-5-ylmethoxy)-1,2-dihydronaphthalen-1-yl)-4-nitrobenzenesulfonamide (4c).** Following the general procedure (I), **4c** was obtained as a white solid (52.8 mg, 55 %).  $R_f = 0.15$  on silica gel (ethyl acetate : petroleum ether = 1 : 5, v/v). mp 173-175 °C. The ee was determined to be 18 % using HPLC analysis on a Chiralcel OD-H column (hexane/2-propanol = 75/25, 1.0 mL/min,  $\lambda = 254$  nm); Retention times were 38.6 min (major) and 53.7 min (minor).  $[\alpha]_D^{20} = -28$  ( $c$  1.00,  $\text{CHCl}_3$ ). IR (film,  $\text{cm}^{-1}$ ): 3735(w), 3294(w), 2921(s), 1729(w), 1529(m), 1444(m), 1348(s), 1254(m), 1163(s), 1094(m), 1039(m), 929(w), 737(w), 615(w), 503(m).  $^1\text{H}$  NMR (400 MHz,  $\text{CDCl}_3$ ):  $\delta$  8.21 (d,  $J = 8.4$  Hz, 2H), 7.97 (d,  $J = 8.4$  Hz, 2H), 7.21-7.10 (m, 4H), 6.72 (d,  $J = 8.0$  Hz, 1H), 6.63-6.56 (m, 3H), 6.00 (d,  $J = 3.6$  Hz, 1H), 5.98 (d,  $J = 4.0$  Hz, 2H), 4.75-4.68 (m, 2H), 4.46 (d,  $J = 12.0$  Hz, 1H), 4.27 (d,  $J = 12.0$  Hz, 1H), 4.10 (t,  $J = 3.6$  Hz, 1H);  $^{13}\text{C}$  NMR (100 MHz,  $\text{CDCl}_3$ ):  $\delta$  149.7, 147.7, 147.3, 146.5, 132.6, 132.0, 131.2, 130.9, 129.9, 128.9, 128.5, 128.3, 127.5, 127.2, 125.6, 124.0, 121.3, 108.2, 101.2, 75.1, 70.6, 55.3. MS (ESI) calcd for  $\text{C}_{24}\text{H}_{20}\text{N}_2\text{O}_7\text{S}$  ( $\text{M}^+$ ): 480.10; Found: 503.76 ( $\text{M}+\text{Na}$ ) $^+$ . Anal. Calcd. for  $\text{C}_{24}\text{H}_{20}\text{N}_2\text{O}_7\text{S}$ : C, 59.99; H, 4.20; N, 5.83; S, 6.67. Found: C, 59.95; H, 4.19; N, 5.80; S, 6.63.

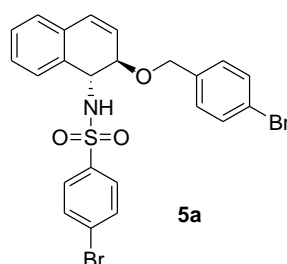

**(1*R*,2*R*)-*N*-(2-(4-Bromobenzyloxy)-1,2-dihydronaphthalen-1-yl)-4-bromobenzenesulfonamide (5a).** Following the general procedure (I), **5a** was obtained as a white solid (74.6 mg, 68 %).  $R_f = 0.15$  on silica gel (ethyl acetate : petroleum ether = 1 : 5, v/v). mp 136-137 °C. The ee was determined to be 4 % using HPLC analysis on a Chiralcel OD-H column (hexane/2-propanol = 85/15, 1.0 mL/min,  $\lambda = 254$  nm); Retention times were 16.7 min (minor) and 27.1 min (major).  $[\alpha]_D^{20} = -17$  ( $c$  1.00,  $\text{CHCl}_3$ ). IR (film,  $\text{cm}^{-1}$ ): 3565(w), 3270(w), 2924(s), 2028(w), 1575(w), 1487(w), 1390(s), 1333(m), 1275(w), 1162(s), 1069(m), 1011(m), 819(m), 739(m), 610(m), 558(w).  $^1\text{H}$  NMR (400 MHz,  $\text{CDCl}_3$ ):  $\delta$  7.65 (d,  $J = 8.4$  Hz, 2H), 7.57 (d,  $J = 8.4$  Hz, 2H), 7.45 (d,  $J = 8.0$  Hz, 2H), 7.28-7.25 (m, 2H), 7.12-7.07 (m, 3H), 6.84 (d,  $J = 8.0$  Hz, 1H), 6.60 (d,  $J = 9.6$  Hz, 1H), 5.98 (dd,  $J = 9.6$  Hz, 4.4 Hz, 1H), 4.63 (d,  $J = 8.0$  Hz, 1H), 4.56-4.51 (m, 2H), 4.43 (d,  $J = 9.6$  Hz, 1H), 4.13 (d,  $J = 4.8$  Hz, 1H);  $^{13}\text{C}$  NMR (100 MHz,  $\text{CDCl}_3$ ):  $\delta$  139.7, 136.9, 132.3, 132.2, 131.7, 131.5, 130.5, 129.4, 129.0, 128.6, 128.5, 128.2, 127.7,

127.4, 124.9, 121.7, 74.9, 70.2, 54.9. MS (ESI) calcd for  $C_{23}H_{19}NO_3Br_2S$  ( $M^+$ ): 546.95; Found: 569.93 ( $M+Na$ )<sup>+</sup>. Anal. Calcd. for  $C_{23}H_{19}NO_3Br_2S$ : C, 50.29; H, 3.49; N, 2.55; S, 5.84. Found: C, 50.32; H, 3.48; N, 2.51; S, 5.80.

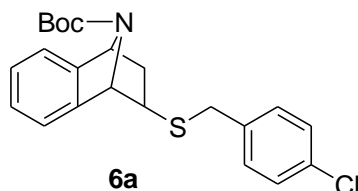

**2-(4-Chloro-benzylsulfanyl)-1,2,3,4-tetrahydro-1,4-epiazano-naphthalene-9-carboxylic acid tert-butyl ester (6a).** Following the general procedure (I), **6a** was obtained as a white solid (64.2 mg, 80 %).  $R_f = 0.25$  on silica gel (ethyl acetate : petroleum ether = 1 : 15, v/v). mp 91-93 °C. The ee was determined to be 9 % using HPLC analysis on a Chiralcel OD-H column (hexane/2-propanol = 90/10, 0.5 mL/min,  $\lambda = 254$  nm); Retention times were 12.2 min (minor) and 16.2 min (major).  $[\alpha]_D^{20} = 9$  ( $c = 1.00$ ,  $CHCl_3$ ). IR (film,  $cm^{-1}$ ): 3339(w), 2962(w), 2926(w), 1714(m), 1488(w), 1366(m), 1248(s), 1170(m), 1081(w), 802(s), 747(m), 693(w), 526(m).  $^1H$  NMR (400 MHz,  $CDCl_3$ ):  $\delta$  7.30-7.26 (m, 4H), 7.20-7.12 (m, 4H), 5.14 (s, 1H), 4.76 (s, 1H), 3.88-3.78 (m, 2H), 2.60 (s, 1H), 1.87-1.84 (m, 1H), 1.78-1.75 (m, 1H), 1.40 (s, 9H);  $^{13}C$  NMR (100 MHz,  $CDCl_3$ ):  $\delta$  167.7, 145.0, 132.9, 130.9, 130.2, 128.8, 126.9, 126.7, 80.3, 65.6, 45.3, 36.4, 30.6, 29.7, 28.3. MS (ESI) calcd for  $C_{22}H_{24}ClNO_2S$  ( $M^+$ ): 401.12; Found: 424.23 ( $M+Na$ )<sup>+</sup>. Anal. Calcd. for  $C_{22}H_{24}ClNO_2S$ : C, 65.74; H, 6.02; N, 3.48; S, 7.98. Found: C, 65.75; H, 5.99; N, 3.44; S, 7.90.

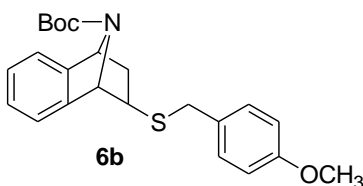

**2-(4-Methoxy-benzylsulfanyl)-1,2,3,4-tetrahydro-1,4-epiazano-naphthalene-9-carboxylic acid tert-butyl ester (6b).** Following the general procedure (I), **6b** was obtained as a white solid (65.1 mg, 82 %).  $R_f = 0.25$  on silica gel (ethyl acetate : petroleum ether = 1 : 15, v/v). mp 85-87 °C. The ee was determined to be 8 % using HPLC analysis on a Chiralcel OD-H column (hexane/2-propanol = 90/10, 0.5 mL/min,  $\lambda = 254$  nm); Retention times were 13.4 min (minor) and 15.2 min (major).  $[\alpha]_D^{20} = 8$  ( $c = 1.00$ ,  $CHCl_3$ ). IR (film,  $cm^{-1}$ ): 3339(w), 2962(w), 2926(w), 1714(m), 1488(w), 1366(m), 1248(s), 1170(m), 1081(w), 802(s), 747(m), 693(w), 526(m).  $^1H$  NMR (400 MHz,  $CDCl_3$ ):  $\delta$  7.31-7.12 (m, 6H), 6.89-6.87 (m, 2H), 5.15-4.99 (m, 1H), 4.77 (s, 1H), 3.87-3.79 (m, 5H), 2.63 (s, 1H), 1.90-1.84 (m, 1H),

1.80-1.73 (m, 1H), 1.42 (s, 9H);  $^{13}\text{C}$  NMR (100 MHz,  $\text{CDCl}_3$ ):  $\delta$  158.7, 145.1, 145.0, 130.0, 129.9, 126.8, 126.6, 114.0, 80.2, 65.2, 60.0, 55.3, 45.2, 36.5, 35.9, 28.3. MS (ESI) calcd for  $\text{C}_{23}\text{H}_{27}\text{NO}_3\text{S}$  ( $\text{M}^+$ ): 397.17; Found: 420.25 ( $\text{M}+\text{Na}$ ) $^+$ . Anal. Calcd. for  $\text{C}_{23}\text{H}_{27}\text{NO}_3\text{S}$ : C, 69.49; H, 6.85; N, 3.52; S, 8.07. Found: C, 69.45; H, 6.83; N, 3.50; S, 8.17.

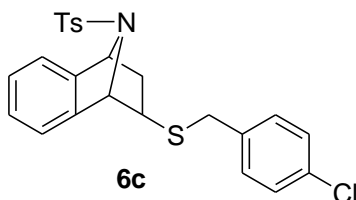

**2-(4-Chloro-benzylsulfanyl)-9-(toluene-4-sulfonyl)-1,2,3,4-tetrahydro-1,4-epiazano-naphthalene (6c).** Following the general procedure (I), **6c** was obtained as a white solid (77.3 mg, 85 %).  $R_f = 0.25$  on silica gel (ethyl acetate : petroleum ether = 1 : 15, v/v). mp 94-96 °C. The ee was determined to be 1 % using HPLC analysis on a Chiralcel OD-H column (hexane/2-propanol = 85/15, 0.5 mL/min,  $\lambda = 254$  nm); Retention times were 35.4 min (major) and 41.9 min (minor).  $[\alpha]_D^{20} = 1$  ( $c$  1.00,  $\text{CHCl}_3$ ). IR (film,  $\text{cm}^{-1}$ ): 2934(w), 2925(w), 1596(w), 1511(m), 1489(w), 1342(m), 1161(s), 1090(m), 1014(w), 971(s), 812(m), 693(w), 679(m), 604(m), 526(m).  $^1\text{H}$  NMR (400 MHz,  $\text{CDCl}_3$ ):  $\delta$  7.29-7.26 (m, 6H), 6.91 (d,  $J = 4.0$  Hz, 2H), 6.86 (s, 3H), 6.73 (d,  $J = 4.4$  Hz, 1H), 5.00 (d,  $J = 4.4$  Hz, 1H), 4.52 (s, 1H), 3.84 (d,  $J = 4.8$  Hz, 2H), 2.51 (dd,  $J = 3.6$  Hz, 8.0 Hz, 1H), 2.25 (s, 3H), 2.01-1.98 (m, 1H), 1.78-1.74 (m, 1H);  $^{13}\text{C}$  NMR (100 MHz,  $\text{CDCl}_3$ ):  $\delta$  143.0, 142.9, 141.7, 136.9, 134.9, 132.9, 130.3, 128.9, 128.8, 127.9, 126.9, 126.7, 120.2, 120.1, 68.3, 63.1, 44.6, 36.7, 36.3, 21.4. MS (ESI) calcd for  $\text{C}_{24}\text{H}_{22}\text{ClNO}_2\text{S}_2$  ( $\text{M}^+$ ): 455.08; Found: 478.43 ( $\text{M}+\text{Na}$ ) $^+$ . Anal. Calcd. for  $\text{C}_{24}\text{H}_{22}\text{ClNO}_2\text{S}_2$ : C, 63.21; H, 4.86; N, 3.07; S, 14.06. Found: C, 63.23; H, 4.83; N, 3.08; S, 14.12.

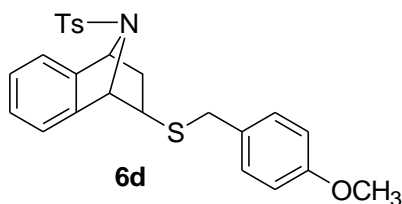

**2-(4-Methoxy-benzylsulfanyl)-9-(toluene-4-sulfonyl)-1,2,3,4-tetrahydro-1,4-epiazano-naphthalene (6d).** Following the general procedure (I), **6d** was obtained as a white solid (79.3 mg, 88 %).  $R_f = 0.20$  on silica gel (ethyl acetate : petroleum ether = 1 : 15, v/v). mp 102-103 °C. The ee was determined to be 5 % using HPLC analysis on a Chiralcel OD-H column (hexane/2-propanol = 85/15, 0.5 mL/min,  $\lambda = 254$  nm); Retention times were 39.0 min (minor) and 48.1 min (major).  $[\alpha]_D^{20} = 5$  ( $c$  1.00,  $\text{CHCl}_3$ ). IR (film,  $\text{cm}^{-1}$ ): 2933(w), 2925(w), 1669(w), 1511(m), 1460(w), 1342(m), 1161(s), 1089(m), 1031(w),

971(s), 813(m), 604(w), 558(m). <sup>1</sup>H NMR (400 MHz, CDCl<sub>3</sub>): δ 7.31 (d, *J* = 8.0 Hz, 2H), 7.24 (d, *J* = 8.4 Hz, 2H), 6.97 (d, *J* = 8.0 Hz, 2H), 6.87-6.85 (m, 5H), 6.75 (d, *J* = 4.0 Hz, 1H), 4.98 (d, *J* = 3.6 Hz, 1H), 4.50 (s, 1H), 3.83 (d, *J* = 4.8 Hz, 2H), 3.80 (s, 3H), 2.55-2.52 (m, 1H), 2.25 (s, 3H), 2.00-1.96 (m, 1H), 1.78-1.73 (m, 1H); <sup>13</sup>C NMR (100 MHz, CDCl<sub>3</sub>): δ 154.7, 139.1, 138.9, 137.9, 131.0, 126.3, 126.1, 124.9, 123.9, 122.9, 122.7, 116.3, 116.2, 110.1, 64.4, 59.2, 51.4, 40.6, 32.7, 32.5, 17.5. MS (ESI) calcd for C<sub>25</sub>H<sub>25</sub>NO<sub>3</sub>S<sub>2</sub> (M<sup>+</sup>): 451.13; Found: 474.41 (M+Na)<sup>+</sup>. Anal. Calcd. for C<sub>25</sub>H<sub>25</sub>NO<sub>3</sub>S<sub>2</sub>: C, 66.49; H, 5.58; N, 3.10; 14.20. Found: C, 66.55; H, 5.54; N, 3.12; 14.11.



### 3. Crystal structure and data of

(1*R*,2*R*)-*N*-(-2-isopropoxy-1,2-dihydronaphthalen-1-yl)-4-methylbenzenesulfonamide (**3c**).

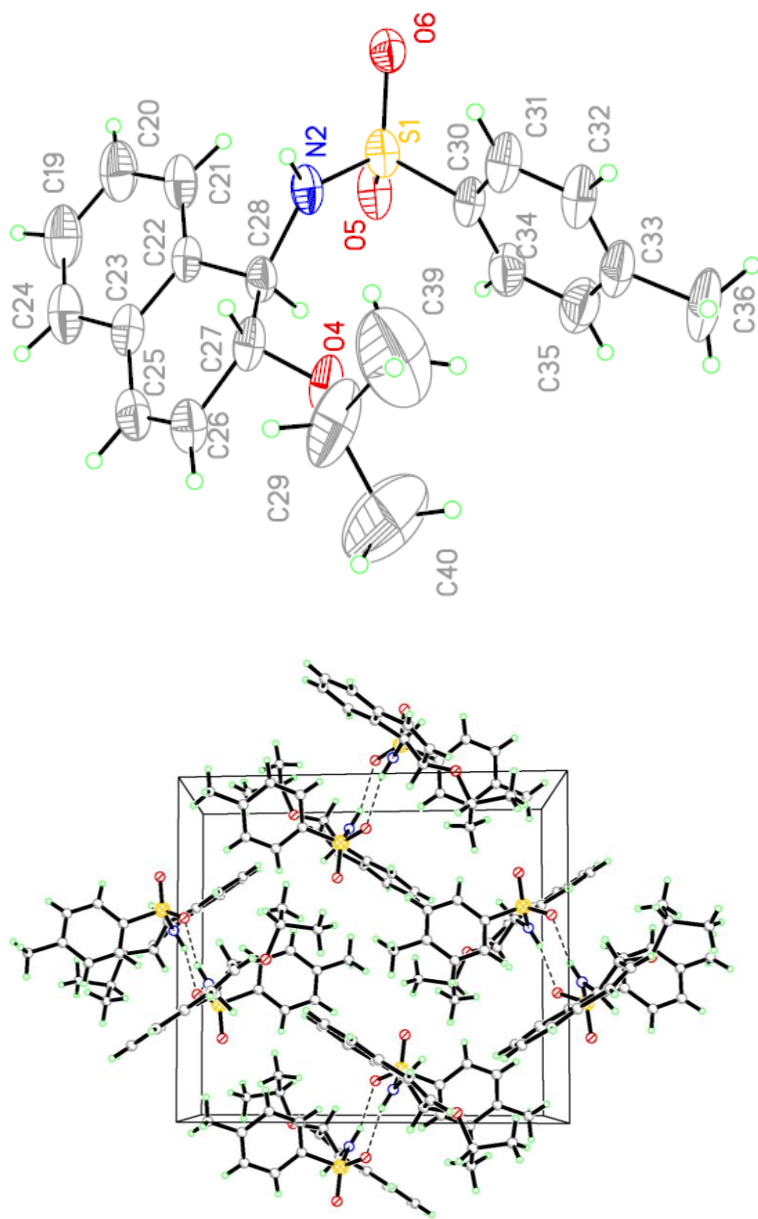

**Table 1.** Crystal data and structure refinement for **3c**.

|                             |                                                                                                                   |
|-----------------------------|-------------------------------------------------------------------------------------------------------------------|
| Identification code         | 3c                                                                                                                |
| Empirical formula           | C <sub>20</sub> H <sub>25</sub> NO <sub>3</sub> S                                                                 |
| Formula weight              | 359.47                                                                                                            |
| Temperature                 | 293(2) K                                                                                                          |
| Wavelength                  | 0.71073 Å                                                                                                         |
| Crystal system, space group | Monoclinic, P21/c                                                                                                 |
| Unit cell dimensions        | a = 9.807(5) Å    alpha = 90 deg.<br>b = 13.026(6) Å    beta = 96.029(8) de<br>c = 14.561(7) Å    gamma = 90 deg. |
| Volume                      | 1849.8(16) Å <sup>3</sup>                                                                                         |

|                                   |                                             |
|-----------------------------------|---------------------------------------------|
| Z, Calculated density             | 4, 1.291 Mg/m <sup>3</sup>                  |
| Absorption coefficient            | 0.193 mm <sup>-1</sup>                      |
| F(000)                            | 768                                         |
| Crystal size                      | 0.20 x 0.18 x 0.16 mm                       |
| Theta range for data collection   | 2.10 to 25.00 deg.                          |
| Limiting indices                  | -10<=h<=11, -15<=k<=15, -17<=l<=17          |
| Reflections collected / unique    | 9163 / 3223 [R(int) = 0.1478]               |
| Completeness to theta = 25.00     | 98.9 %                                      |
| Absorption correction             | None                                        |
| Refinement method                 | Full-matrix least-squares on F <sup>2</sup> |
| Data / restraints / parameters    | 3223 / 135 / 229                            |
| Goodness-of-fit on F <sup>2</sup> | 1.003                                       |
| Final R indices [I > 2 sigma (I)] | R1 = 0.0813, wR2 = 0.1339                   |
| R indices (all data)              | R1 = 0.2585, wR2 = 0.1580                   |
| Largest diff. peak and hole       | 0.373 and -0.392 e.A <sup>-3</sup>          |

**Table 2. Atomic coordinates ( x 10<sup>4</sup>) and equivalent isotropic displacement parameters (Å<sup>2</sup> x 10<sup>3</sup>) for 3c. U(eq) is defined as one third of the trace of the orthogonalized Uij tensor.**

|       | x        | y       | z        | U(eq)  |
|-------|----------|---------|----------|--------|
| S(1)  | 4771(2)  | 3517(2) | 825(1)   | 69(1)  |
| O(4)  | 1681(5)  | 4748(3) | 2233(3)  | 85(2)  |
| O(5)  | 4463(4)  | 2452(3) | 928(3)   | 85(2)  |
| O(6)  | 5810(4)  | 3848(3) | 132(3)   | 74(1)  |
| N(2)  | 3410(5)  | 4093(3) | 605(3)   | 68(2)  |
| C(19) | 66(10)   | 2195(6) | -1187(6) | 113(3) |
| C(20) | 1453(9)  | 2225(6) | -1268(5) | 107(3) |
| C(21) | 2077(8)  | 2763(5) | -603(5)  | 89(2)  |
| C(22) | 1344(7)  | 3238(5) | 110(4)   | 63(2)  |
| C(23) | -85(8)   | 3215(5) | 201(5)   | 73(2)  |
| C(24) | -686(8)  | 2672(5) | -480(5)  | 98(3)  |
| C(25) | -846(7)  | 3734(5) | 946(5)   | 81(2)  |
| C(26) | -294(8)  | 4356(5) | 1505(5)  | 81(2)  |
| C(27) | 1185(8)  | 4586(5) | 1369(4)  | 73(2)  |
| C(28) | 2011(7)  | 3736(5) | 887(4)   | 64(2)  |
| C(29) | 1340(12) | 5762(6) | 2627(6)  | 151(4) |

|       |          |         |         |        |
|-------|----------|---------|---------|--------|
| C(30) | 5252(7)  | 3969(5) | 1886(4) | 68(2)  |
| C(31) | 5852(7)  | 4908(5) | 1933(5) | 85(2)  |
| C(32) | 6319(7)  | 5237(6) | 2742(5) | 94(2)  |
| C(33) | 6206(8)  | 4598(7) | 3494(5) | 88(2)  |
| C(34) | 5144(7)  | 3330(5) | 2627(5) | 90(2)  |
| C(35) | 5599(8)  | 3657(7) | 3450(5) | 107(3) |
| C(36) | 6782(8)  | 4943(6) | 4382(4) | 130(3) |
| C(39) | 2550(12) | 6302(8) | 2629(8) | 226(5) |
| C(40) | 1053(14) | 5591(7) | 3622(6) | 239(5) |

**Table 3. Bond lengths [Å] and angles [deg] for 3c.**

|              |           |
|--------------|-----------|
| S(1)-O(5)    | 1.431(4)  |
| S(1)-N(2)    | 1.536(5)  |
| S(1)-O(6)    | 1.568(4)  |
| S(1)-C(30)   | 1.675(6)  |
| O(4)-C(27)   | 1.317(6)  |
| O(4)-C(29)   | 1.492(8)  |
| N(2)-C(28)   | 1.545(7)  |
| N(2)-H(2C)   | 0.8600    |
| C(19)-C(20)  | 1.378(10) |
| C(19)-C(24)  | 1.466(9)  |
| C(19)-H(19A) | 0.9300    |
| C(20)-C(21)  | 1.295(8)  |
| C(20)-H(20A) | 0.9300    |
| C(21)-C(22)  | 1.462(8)  |
| C(21)-H(21A) | 0.9300    |
| C(22)-C(28)  | 1.405(7)  |
| C(22)-C(23)  | 1.422(8)  |
| C(23)-C(24)  | 1.307(8)  |
| C(23)-C(25)  | 1.536(9)  |

|              |           |
|--------------|-----------|
| C(24)-H(24A) | 0.9300    |
| C(25)-C(26)  | 1.233(7)  |
| C(25)-H(25A) | 0.9300    |
| C(26)-C(27)  | 1.515(9)  |
| C(26)-H(26A) | 0.9300    |
| C(27)-C(28)  | 1.579(8)  |
| C(27)-H(27A) | 0.9800    |
| C(28)-H(28A) | 0.9800    |
| C(29)-C(39)  | 1.379(13) |
| C(29)-C(40)  | 1.521(11) |
| C(29)-H(29A) | 0.9800    |
| C(30)-C(31)  | 1.355(8)  |
| C(30)-C(34)  | 1.376(8)  |
| C(31)-C(32)  | 1.292(7)  |
| C(31)-H(31A) | 0.9300    |
| C(32)-C(33)  | 1.389(9)  |
| C(32)-H(32A) | 0.9300    |
| C(33)-C(35)  | 1.361(9)  |
| C(33)-C(36)  | 1.428(8)  |
| C(34)-C(35)  | 1.306(8)  |
| C(34)-H(34A) | 0.9300    |
| C(35)-H(35A) | 0.9300    |
| C(36)-H(36A) | 0.9600    |
| C(36)-H(36B) | 0.9600    |
| C(36)-H(36C) | 0.9600    |
| C(39)-H(39A) | 0.9600    |
| C(39)-H(39B) | 0.9600    |
| C(39)-H(39C) | 0.9600    |
| C(40)-H(40A) | 0.9600    |
| C(40)-H(40B) | 0.9600    |

|                    |          |
|--------------------|----------|
| C(40)-H(40C)       | 0.9600   |
| O(5)-S(1)-N(2)     | 107.9(3) |
| O(5)-S(1)-O(6)     | 119.6(3) |
| N(2)-S(1)-O(6)     | 109.9(3) |
| O(5)-S(1)-C(30)    | 106.7(3) |
| N(2)-S(1)-C(30)    | 100.1(3) |
| O(6)-S(1)-C(30)    | 110.9(3) |
| C(27)-O(4)-C(29)   | 115.8(5) |
| S(1)-N(2)-C(28)    | 125.0(4) |
| S(1)-N(2)-H(2C)    | 117.5    |
| C(28)-N(2)-H(2C)   | 117.5    |
| C(20)-C(19)-C(24)  | 128.4(8) |
| C(20)-C(19)-H(19A) | 115.8    |
| C(24)-C(19)-H(19A) | 115.8    |
| C(21)-C(20)-C(19)  | 110.2(9) |
| C(21)-C(20)-H(20A) | 124.9    |
| C(19)-C(20)-H(20A) | 124.9    |
| C(20)-C(21)-C(22)  | 122.0(8) |
| C(20)-C(21)-H(21A) | 119.0    |
| C(22)-C(21)-H(21A) | 119.0    |
| C(28)-C(22)-C(23)  | 108.4(7) |
| C(28)-C(22)-C(21)  | 123.0(7) |
| C(23)-C(22)-C(21)  | 128.4(6) |
| C(24)-C(23)-C(22)  | 108.1(8) |
| C(24)-C(23)-C(25)  | 124.1(8) |
| C(22)-C(23)-C(25)  | 127.8(6) |
| C(23)-C(24)-C(19)  | 122.8(8) |
| C(23)-C(24)-H(24A) | 118.6    |
| C(19)-C(24)-H(24A) | 118.6    |
| C(26)-C(25)-C(23)  | 122.9(8) |

|                    |           |
|--------------------|-----------|
| C(26)-C(25)-H(25A) | 118.5     |
| C(23)-C(25)-H(25A) | 118.5     |
| C(25)-C(26)-C(27)  | 113.8(8)  |
| C(25)-C(26)-H(26A) | 123.1     |
| C(27)-C(26)-H(26A) | 123.1     |
| O(4)-C(27)-C(26)   | 99.7(6)   |
| O(4)-C(27)-C(28)   | 112.4(5)  |
| C(26)-C(27)-C(28)  | 117.6(6)  |
| O(4)-C(27)-H(27A)  | 108.9     |
| C(26)-C(27)-H(27A) | 108.9     |
| C(28)-C(27)-H(27A) | 108.9     |
| C(22)-C(28)-N(2)   | 106.0(6)  |
| C(22)-C(28)-C(27)  | 117.6(6)  |
| N(2)-C(28)-C(27)   | 114.7(5)  |
| C(22)-C(28)-H(28A) | 105.8     |
| N(2)-C(28)-H(28A)  | 105.8     |
| C(27)-C(28)-H(28A) | 105.8     |
| C(39)-C(29)-O(4)   | 103.0(10) |
| C(39)-C(29)-C(40)  | 108.6(8)  |
| O(4)-C(29)-C(40)   | 107.9(7)  |
| C(39)-C(29)-H(29A) | 112.3     |
| O(4)-C(29)-H(29A)  | 112.3     |
| C(40)-C(29)-H(29A) | 112.3     |
| C(31)-C(30)-C(34)  | 125.1(6)  |
| C(31)-C(30)-S(1)   | 116.3(6)  |
| C(34)-C(30)-S(1)   | 118.2(6)  |
| C(32)-C(31)-C(30)  | 117.1(7)  |
| C(32)-C(31)-H(31A) | 121.5     |
| C(30)-C(31)-H(31A) | 121.5     |
| C(31)-C(32)-C(33)  | 118.1(8)  |

|                     |          |
|---------------------|----------|
| C(31)-C(32)-H(32A)  | 121.0    |
| C(33)-C(32)-H(32A)  | 121.0    |
| C(35)-C(33)-C(32)   | 125.0(8) |
| C(35)-C(33)-C(36)   | 117.1(8) |
| C(32)-C(33)-C(36)   | 117.9(8) |
| C(35)-C(34)-C(30)   | 118.3(7) |
| C(35)-C(34)-H(34A)  | 120.8    |
| C(30)-C(34)-H(34A)  | 120.8    |
| C(34)-C(35)-C(33)   | 116.3(8) |
| C(34)-C(35)-H(35A)  | 121.9    |
| C(33)-C(35)-H(35A)  | 121.9    |
| C(33)-C(36)-H(36A)  | 109.5    |
| C(33)-C(36)-H(36B)  | 109.5    |
| H(36A)-C(36)-H(36B) | 109.5    |
| C(33)-C(36)-H(36C)  | 109.5    |
| H(36A)-C(36)-H(36C) | 109.5    |
| H(36B)-C(36)-H(36C) | 109.5    |
| C(29)-C(39)-H(39A)  | 109.5    |
| C(29)-C(39)-H(39B)  | 109.5    |
| H(39A)-C(39)-H(39B) | 109.5    |
| C(29)-C(39)-H(39C)  | 109.5    |
| H(39A)-C(39)-H(39C) | 109.5    |
| H(39B)-C(39)-H(39C) | 109.5    |
| C(29)-C(40)-H(40A)  | 109.5    |
| C(29)-C(40)-H(40B)  | 109.5    |
| H(40A)-C(40)-H(40B) | 109.5    |
| C(29)-C(40)-H(40C)  | 109.5    |
| H(40A)-C(40)-H(40C) | 109.5    |
| H(40B)-C(40)-H(40C) | 109.5    |

Symmetry transformations used to generate equivalent atoms:

**Table 4. Anisotropic displacement parameters ( $\text{\AA}^2 \times 10^3$ ) for 3c. The anisotropic displacement factor exponent takes the form:  $-2 \pi^2 [h^2 a^{*2} U_{11} + \dots + 2 h k a^* b^* U_{12}]$**

|       | U11     | U22     | U33     | U23     | U13    | U12    |
|-------|---------|---------|---------|---------|--------|--------|
| S(1)  | 62(1)   | 67(1)   | 74(1)   | -4(1)   | -16(1) | 5(1)   |
| O(4)  | 91(4)   | 86(3)   | 70(3)   | -5(3)   | -36(3) | 13(3)  |
| O(5)  | 79(4)   | 63(3)   | 104(4)  | -8(3)   | -35(3) | 6(3)   |
| O(6)  | 57(3)   | 94(4)   | 68(3)   | 0(3)    | -5(3)  | 6(3)   |
| N(2)  | 54(4)   | 69(4)   | 76(4)   | 5(3)    | -20(3) | 13(3)  |
| C(19) | 111(6)  | 104(5)  | 111(6)  | -26(4)  | -46(6) | -5(6)  |
| C(20) | 101(6)  | 103(5)  | 106(5)  | -32(4)  | -37(5) | 3(5)   |
| C(21) | 78(5)   | 95(5)   | 87(5)   | -11(4)  | -32(4) | -7(4)  |
| C(22) | 60(4)   | 66(4)   | 58(4)   | -2(3)   | -19(4) | -1(4)  |
| C(23) | 76(5)   | 65(4)   | 71(4)   | 5(3)    | -25(4) | 0(4)   |
| C(24) | 89(6)   | 90(5)   | 106(6)  | -7(4)   | -41(5) | -5(4)  |
| C(25) | 63(5)   | 85(5)   | 89(5)   | 12(4)   | -19(4) | 4(4)   |
| C(26) | 71(5)   | 82(5)   | 85(5)   | -3(4)   | -19(4) | 11(4)  |
| C(27) | 77(5)   | 68(4)   | 65(4)   | 1(4)    | -28(4) | 15(4)  |
| C(28) | 55(4)   | 71(4)   | 62(4)   | 3(3)    | -14(4) | 15(4)  |
| C(29) | 248(11) | 86(6)   | 100(5)  | -46(5)  | -73(7) | -34(6) |
| C(30) | 68(5)   | 69(5)   | 60(4)   | 0(4)    | -22(4) | 12(4)  |
| C(31) | 95(5)   | 76(5)   | 76(5)   | -5(4)   | -33(4) | 17(4)  |
| C(32) | 96(5)   | 96(5)   | 81(5)   | -17(4)  | -40(5) | 10(4)  |
| C(33) | 85(5)   | 105(6)  | 66(4)   | -10(5)  | -29(4) | 23(5)  |
| C(34) | 85(5)   | 94(5)   | 85(5)   | 5(4)    | -24(5) | -19(4) |
| C(35) | 109(6)  | 129(6)  | 75(5)   | 17(5)   | -23(5) | -6(5)  |
| C(36) | 126(8)  | 160(7)  | 88(6)   | -28(5)  | -63(5) | 29(6)  |
| C(39) | 181(10) | 177(10) | 309(11) | -128(9) | -28(9) | 3(7)   |
| C(40) | 387(13) | 194(9)  | 133(7)  | -79(8)  | 10(9)  | -40(9) |



**Table 5. Hydrogen coordinates (  $\times 10^4$ ) and isotropic displacement parameters ( $\text{\AA}^2 \times 10^3$ ) for 3c.**

|        | x     | y    | z     | U(eq) |
|--------|-------|------|-------|-------|
| H(2C)  | 3425  | 4654 | 294   | 82    |
| H(19A) | -461  | 1824 | -1640 | 135   |
| H(20A) | 1879  | 1905 | -1732 | 128   |
| H(21A) | 3022  | 2848 | -579  | 107   |
| H(24A) | -1631 | 2585 | -518  | 118   |
| H(25A) | -1763 | 3571 | 976   | 97    |
| H(26A) | -745  | 4656 | 1968  | 97    |
| H(27A) | 1222  | 5229 | 1023  | 87    |
| H(28A) | 2219  | 3199 | 1352  | 77    |
| H(29A) | 576   | 6103 | 2260  | 181   |
| H(31A) | 5925  | 5298 | 1405  | 102   |
| H(32A) | 6718  | 5883 | 2819  | 113   |
| H(34A) | 4756  | 2680 | 2544  | 108   |
| H(35A) | 5514  | 3269 | 3977  | 128   |
| H(36A) | 6371  | 4574 | 4853  | 195   |
| H(36B) | 6610  | 5664 | 4442  | 195   |
| H(36C) | 7753  | 4822 | 4448  | 195   |
| H(39A) | 2896  | 6229 | 2040  | 339   |
| H(39B) | 3210  | 6037 | 3103  | 339   |
| H(39C) | 2387  | 7014 | 2745  | 339   |
| H(40A) | 1870  | 5724 | 4028  | 358   |
| H(40B) | 770   | 4893 | 3698  | 358   |
| H(40C) | 338   | 6047 | 3769  | 358   |

#### 4. The parties of the copies of HPLC of 2b, 3h and 3f.

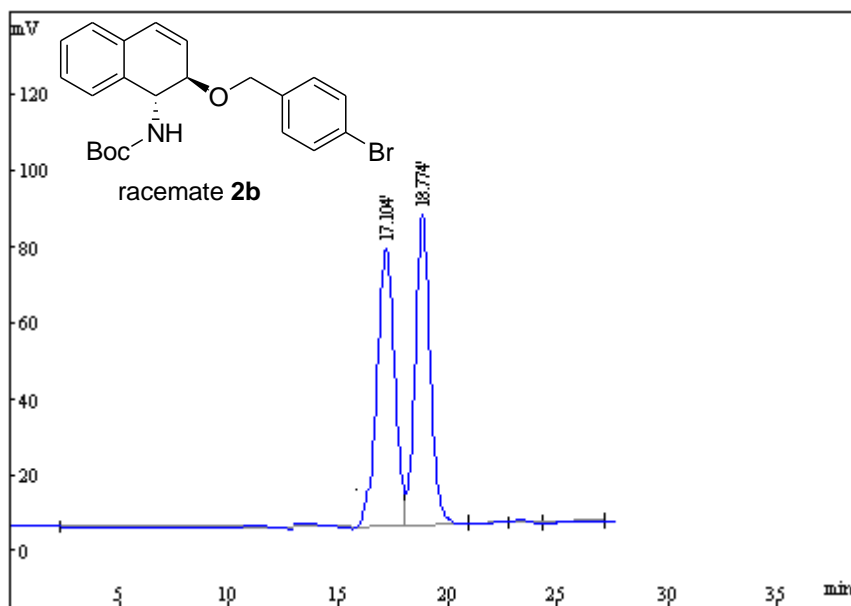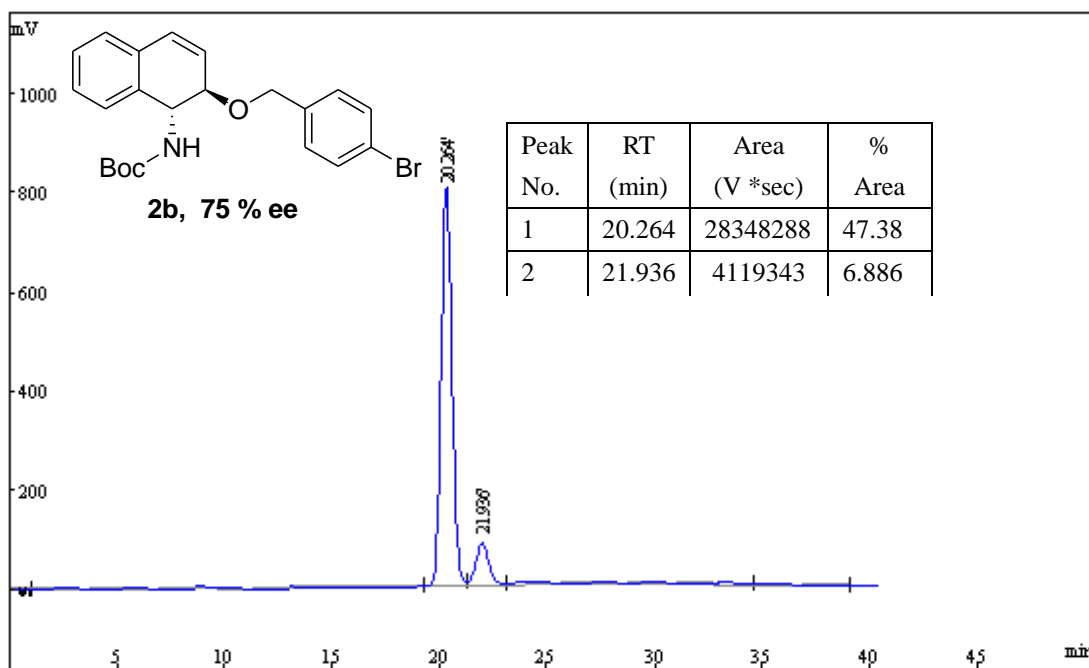

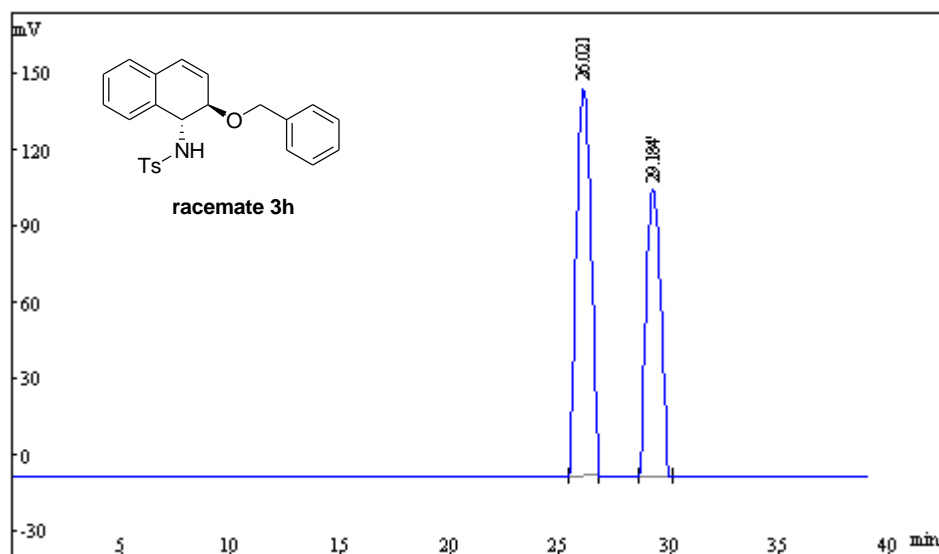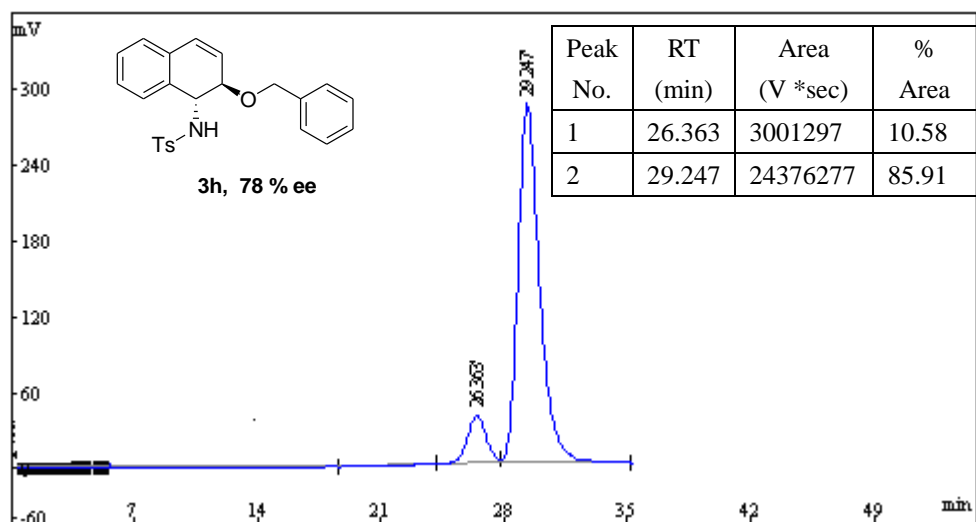

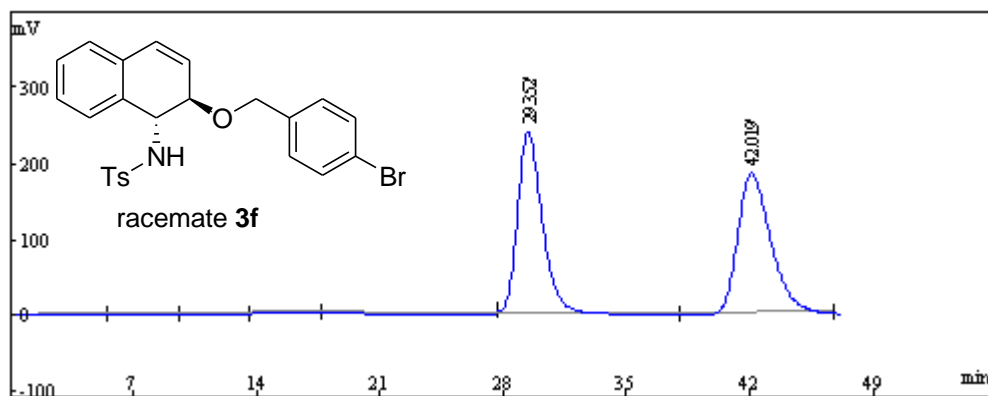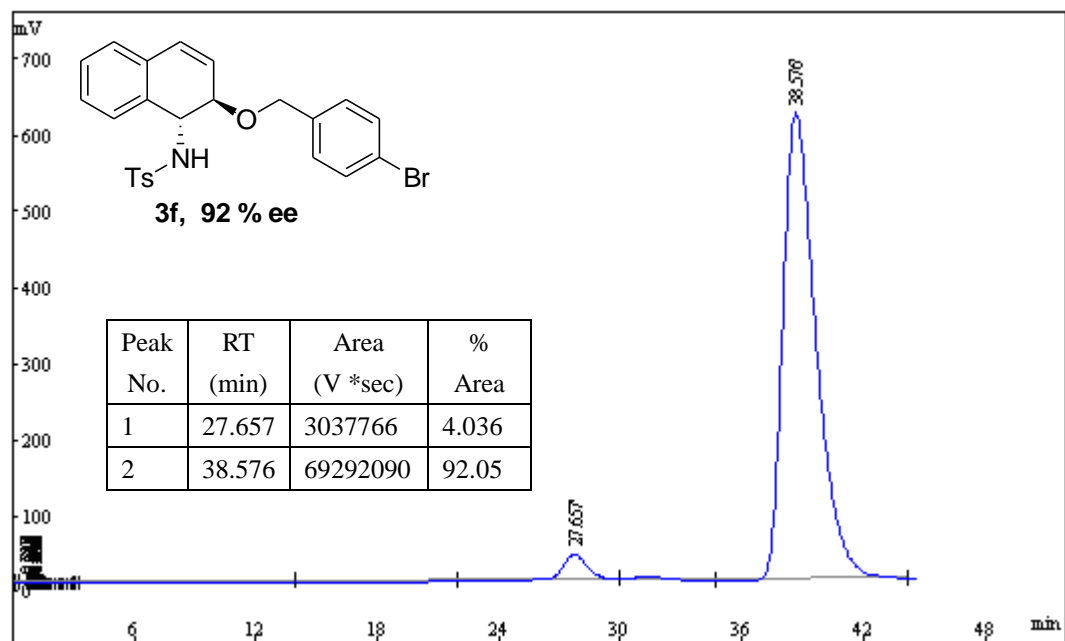

5. Copies of  $^1\text{H}$  and  $^{13}\text{C}$  NMR spectra of 3fa, 2a–2b, 3a–3l, 4a–4c, 5a and 6a–6d.

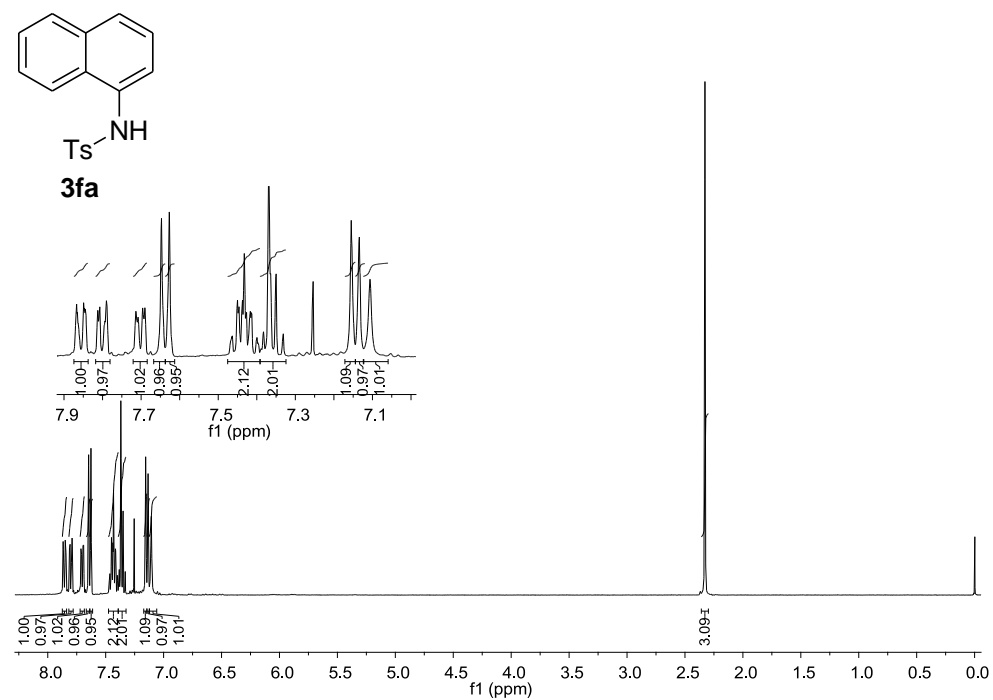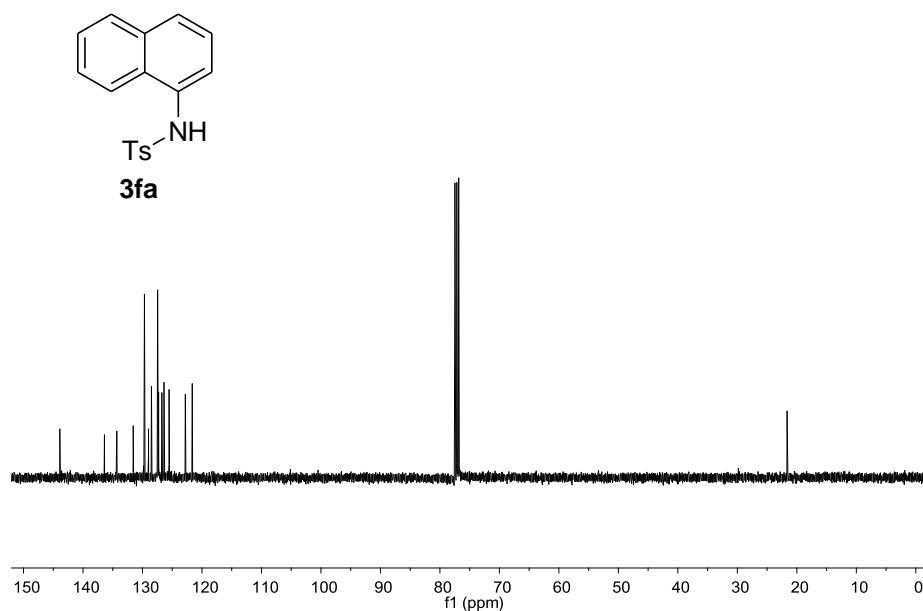

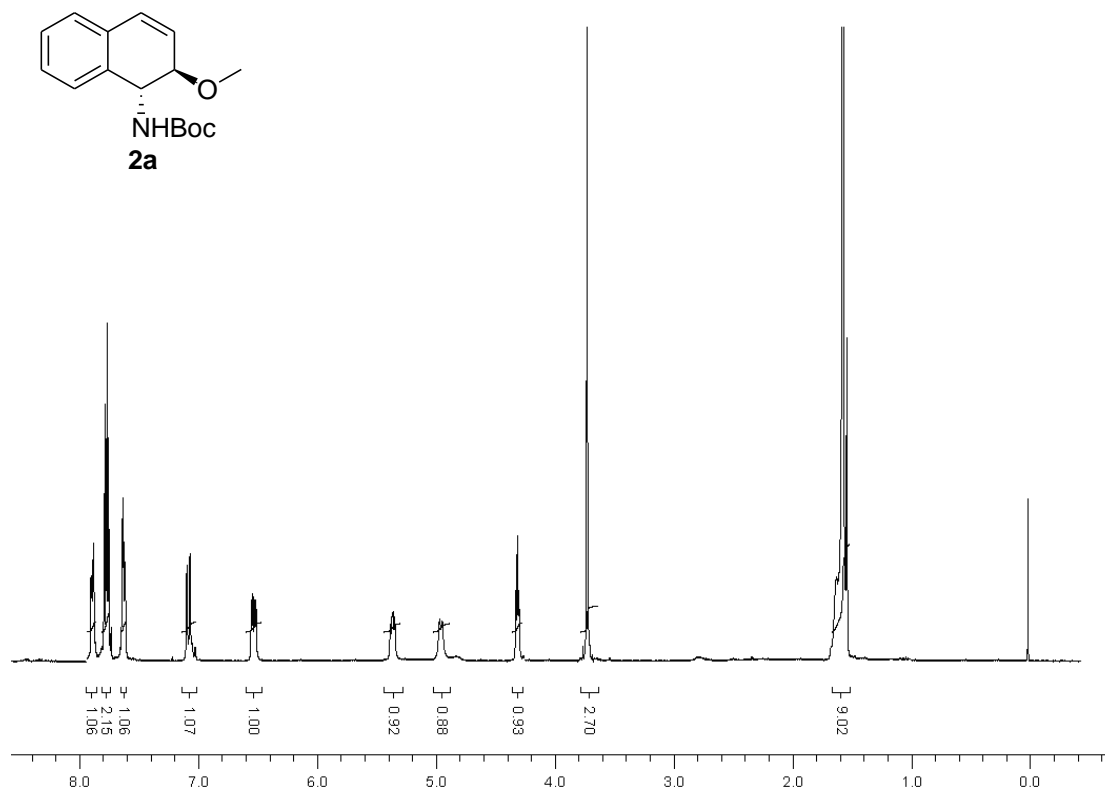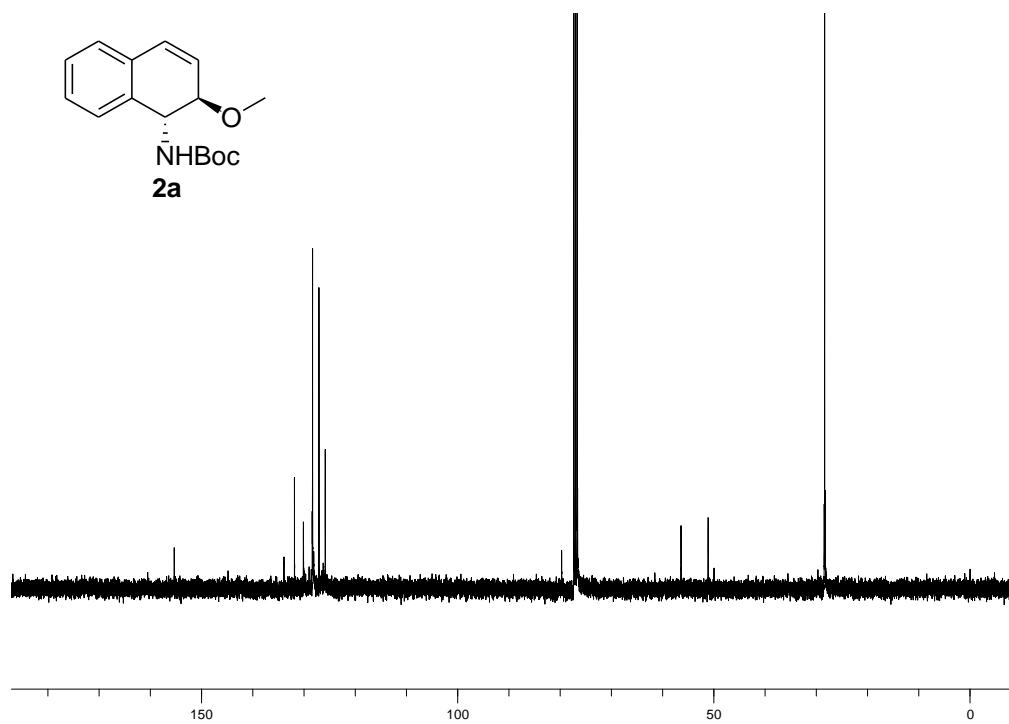

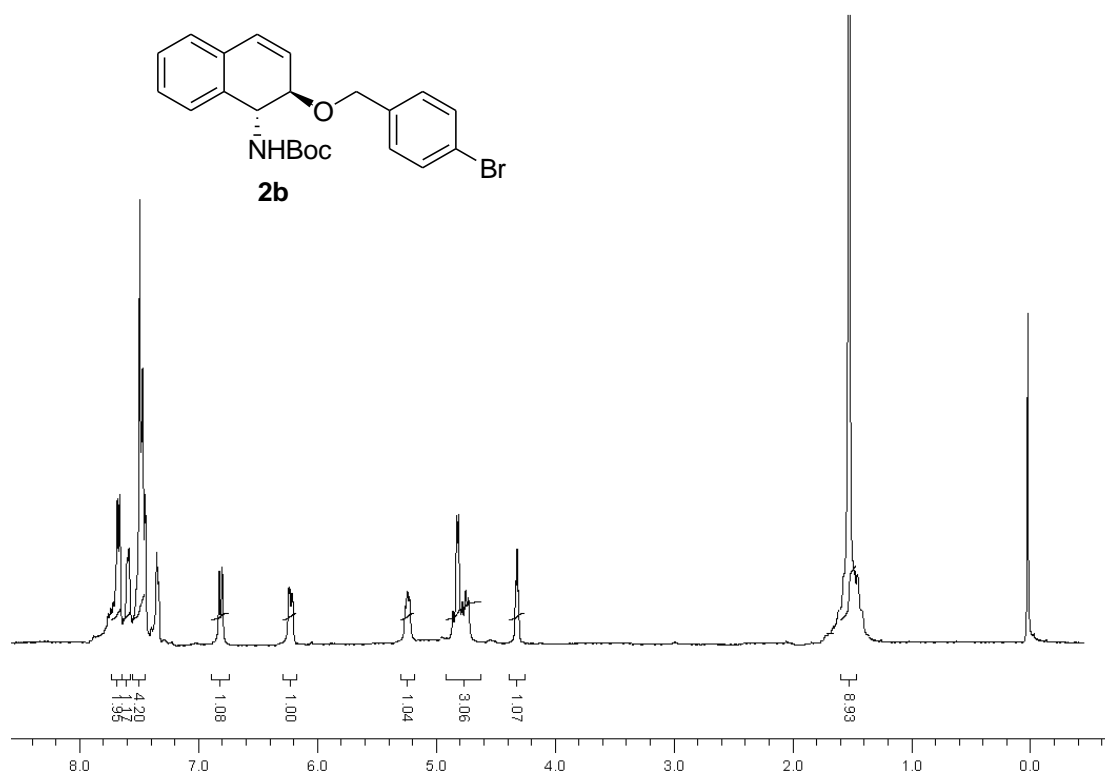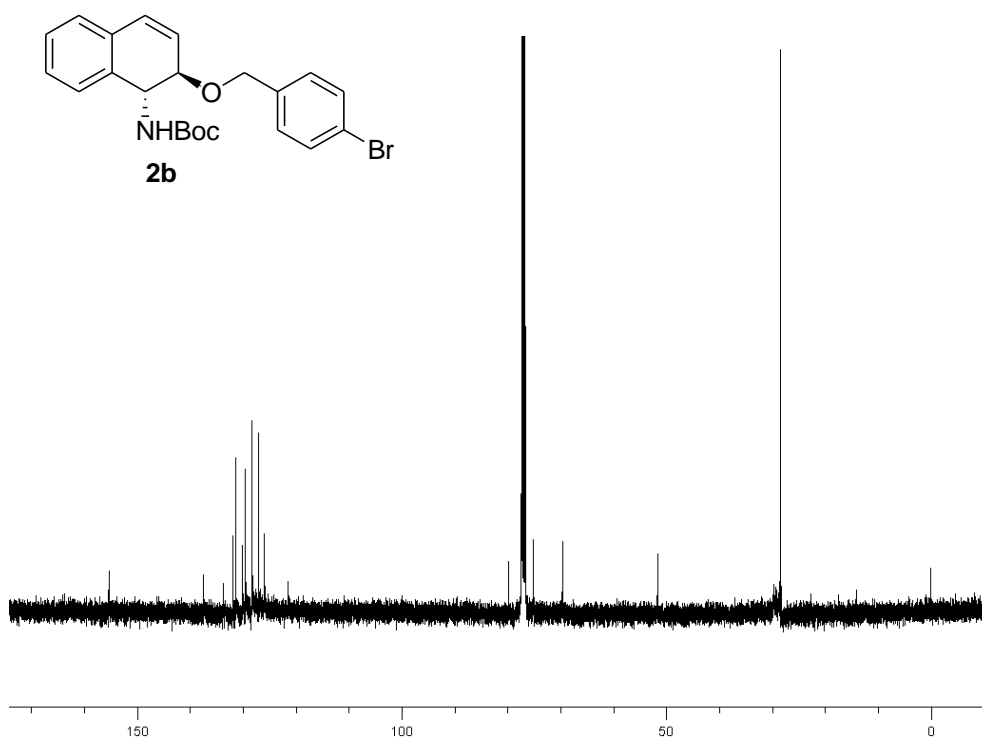

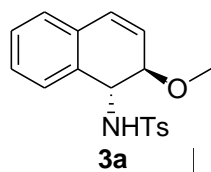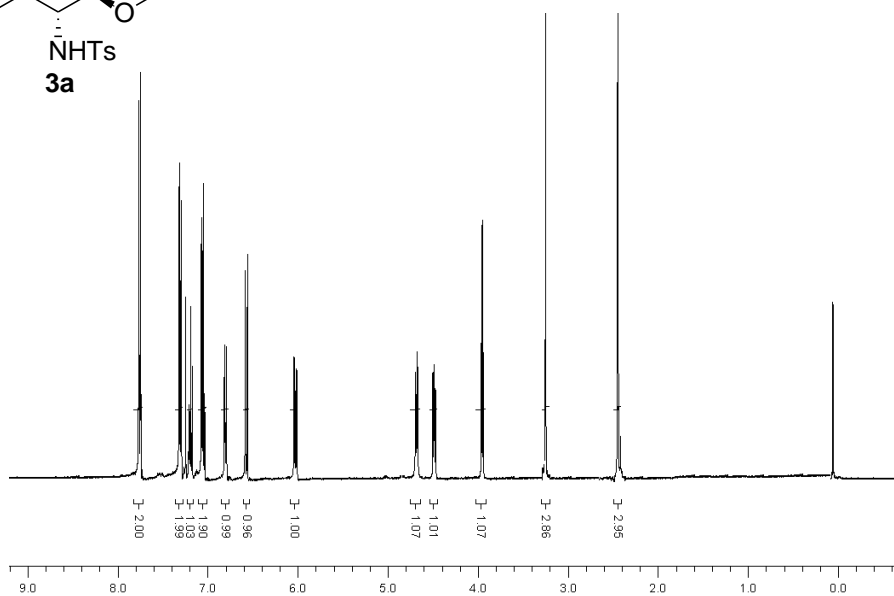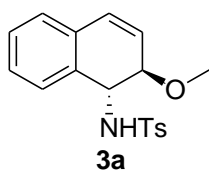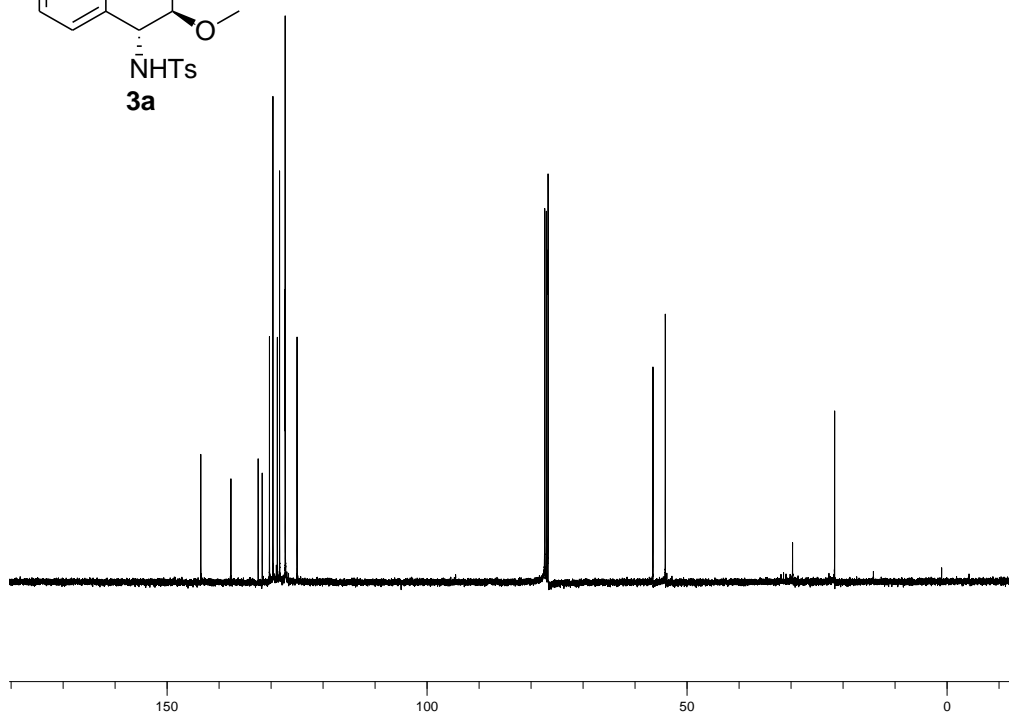



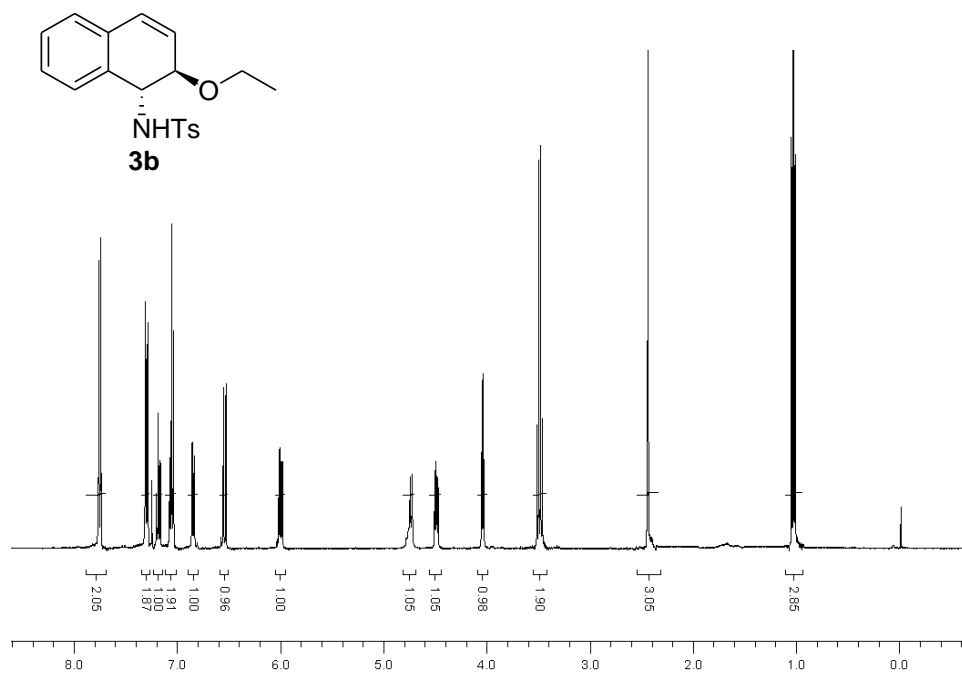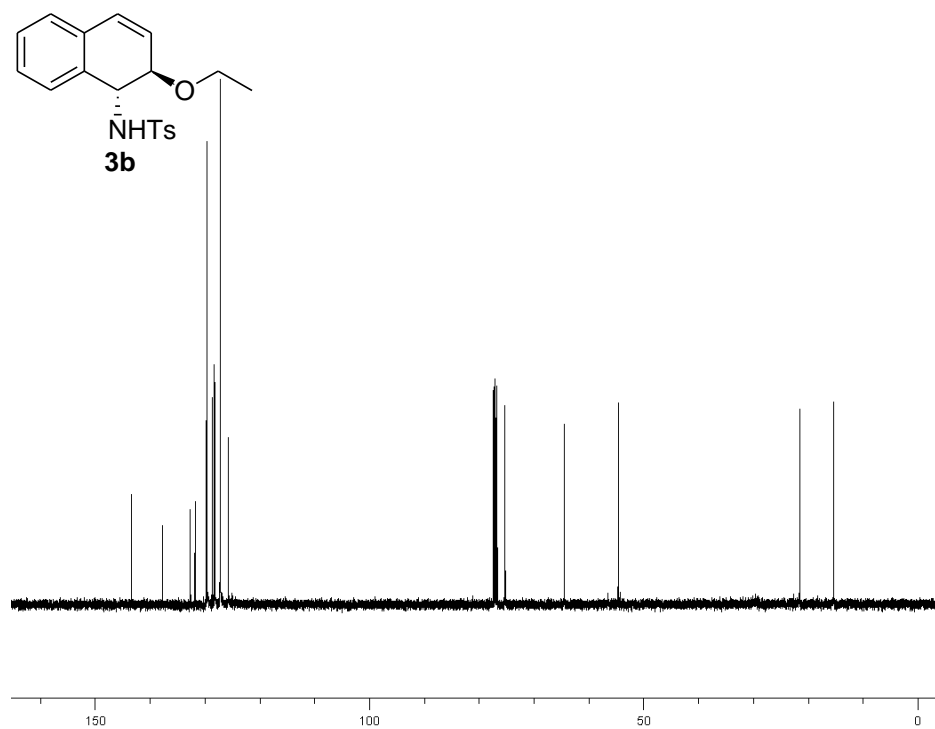

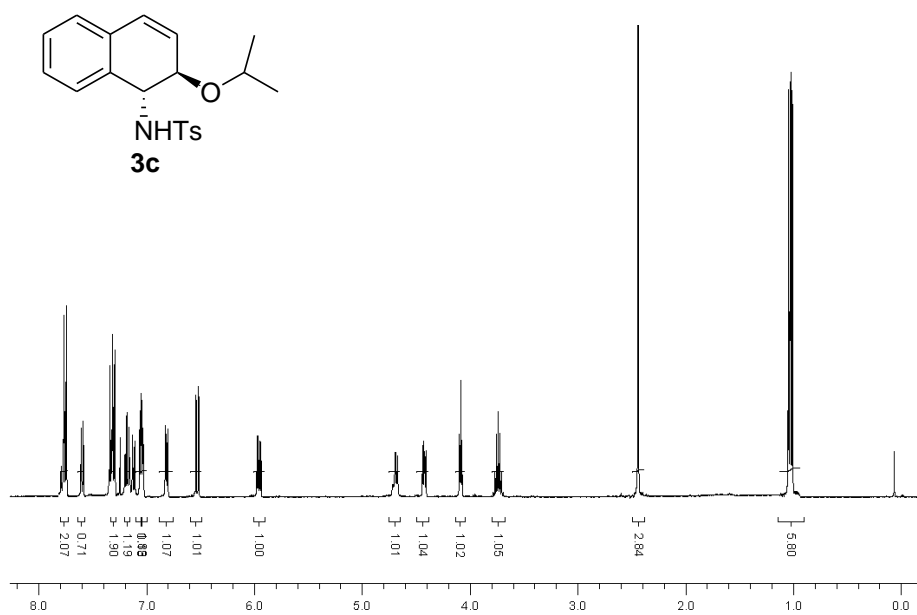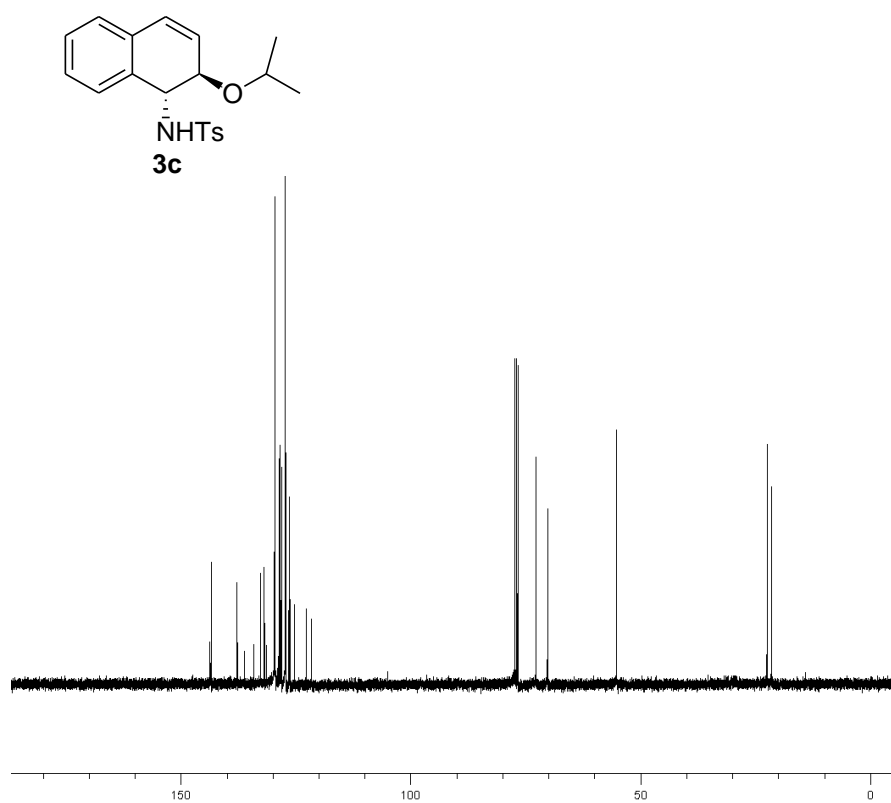

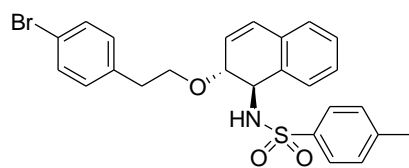

**3d**

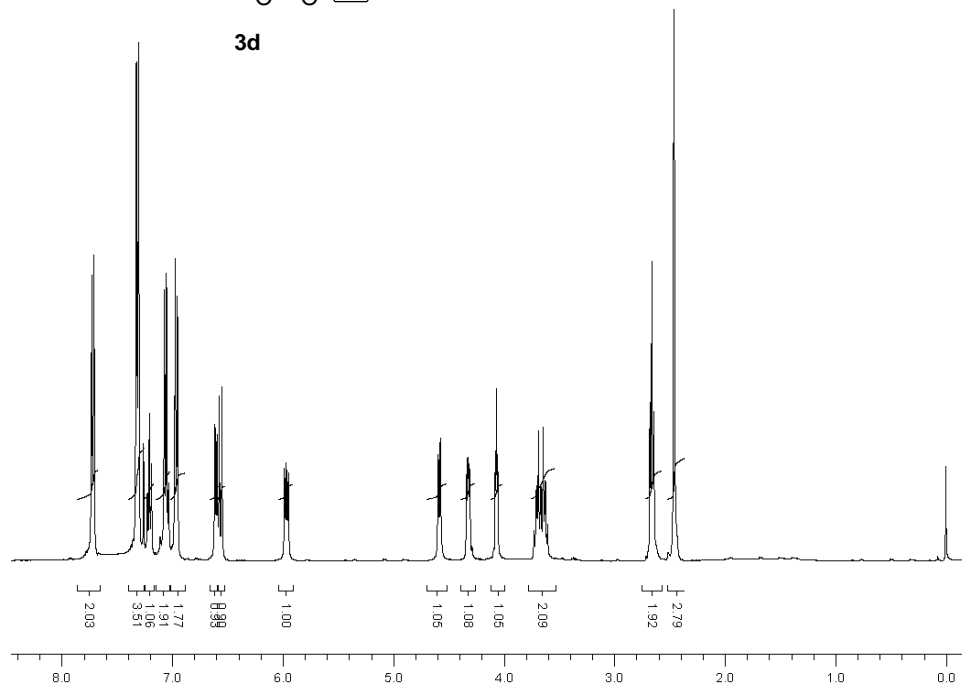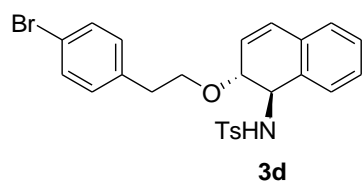

**3d**

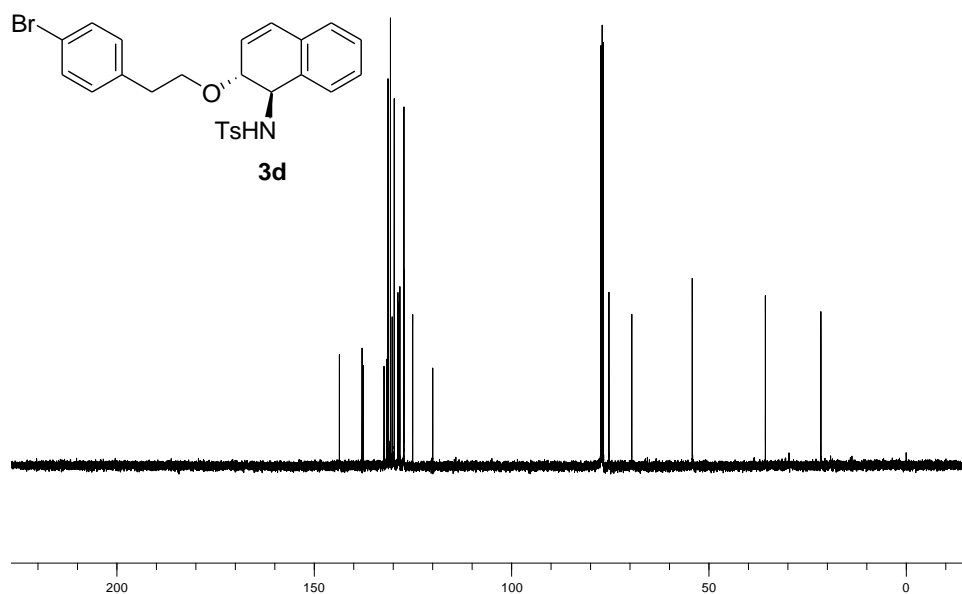

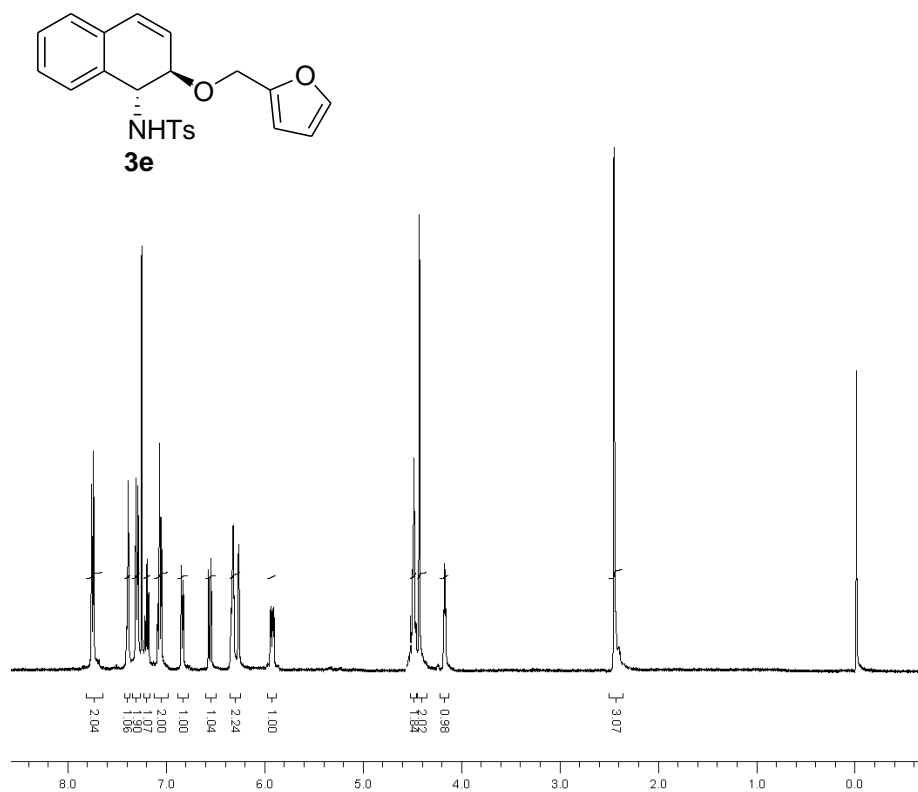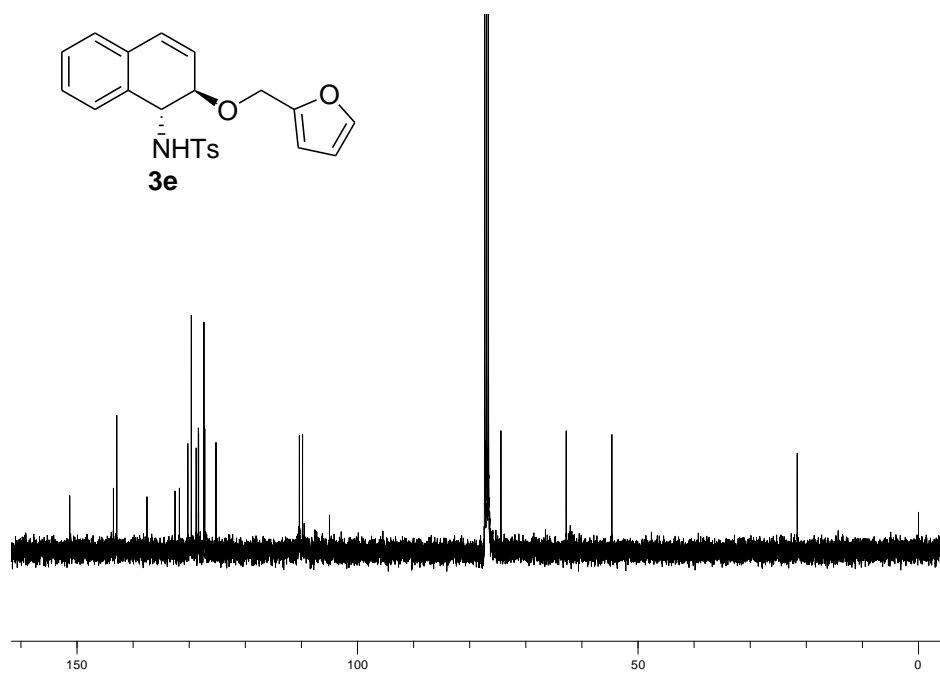

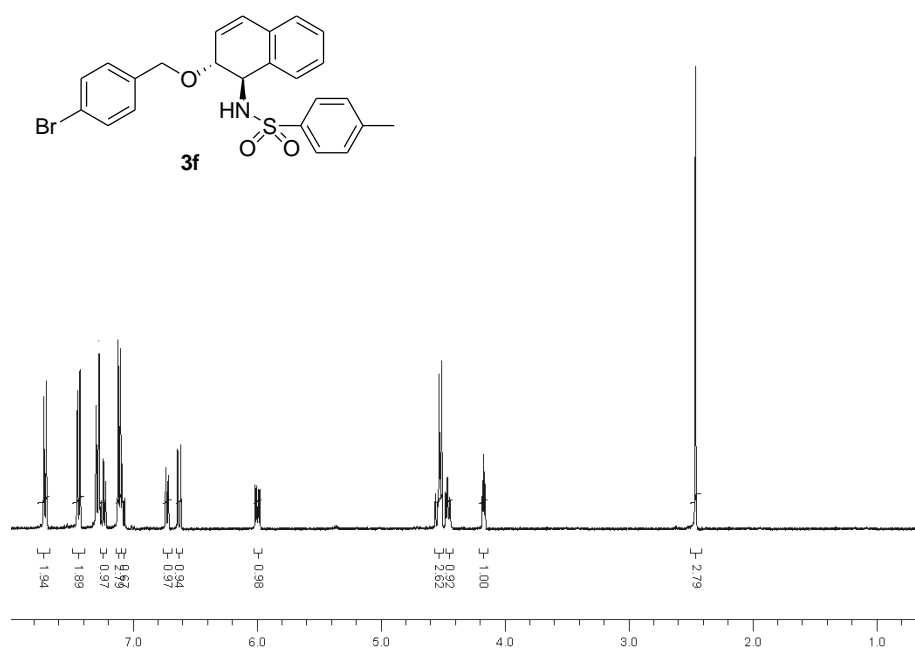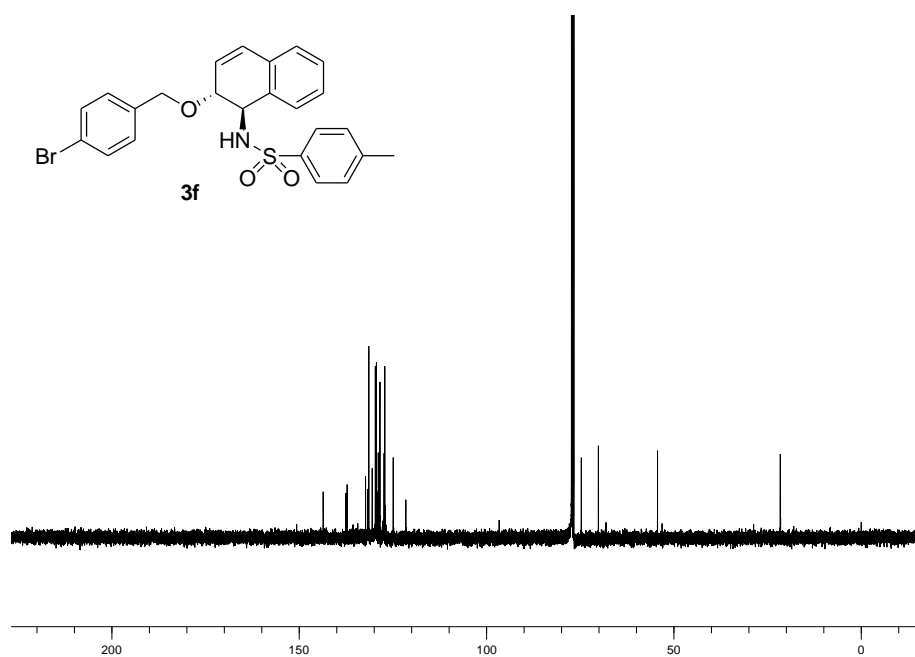

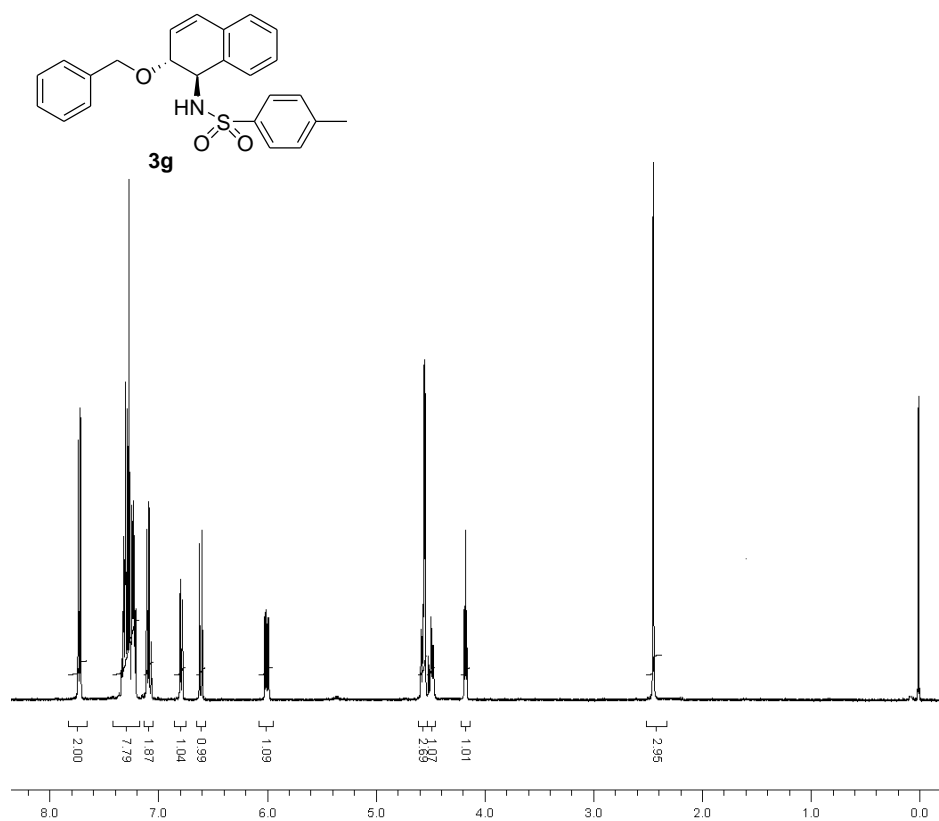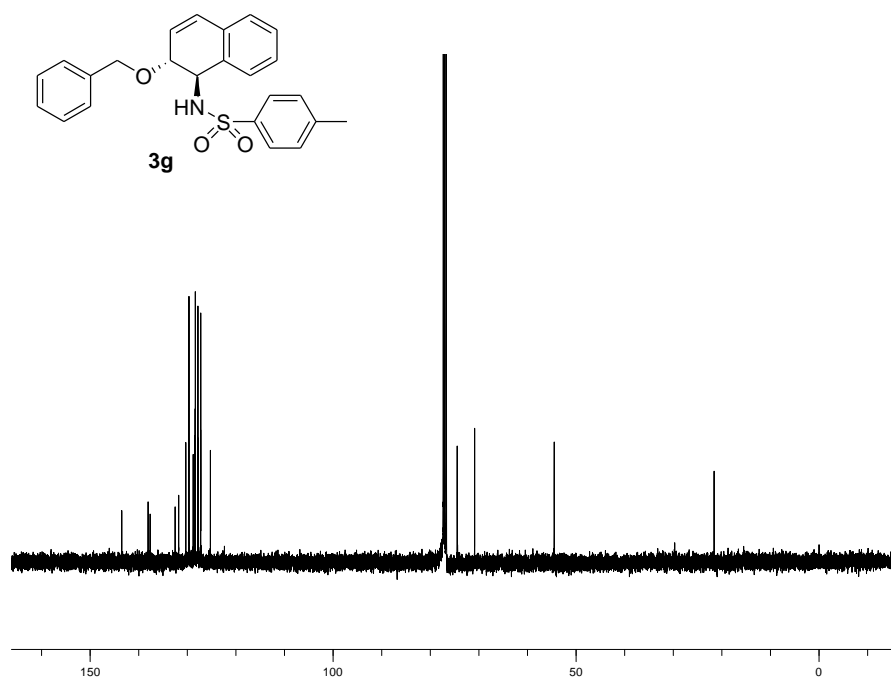

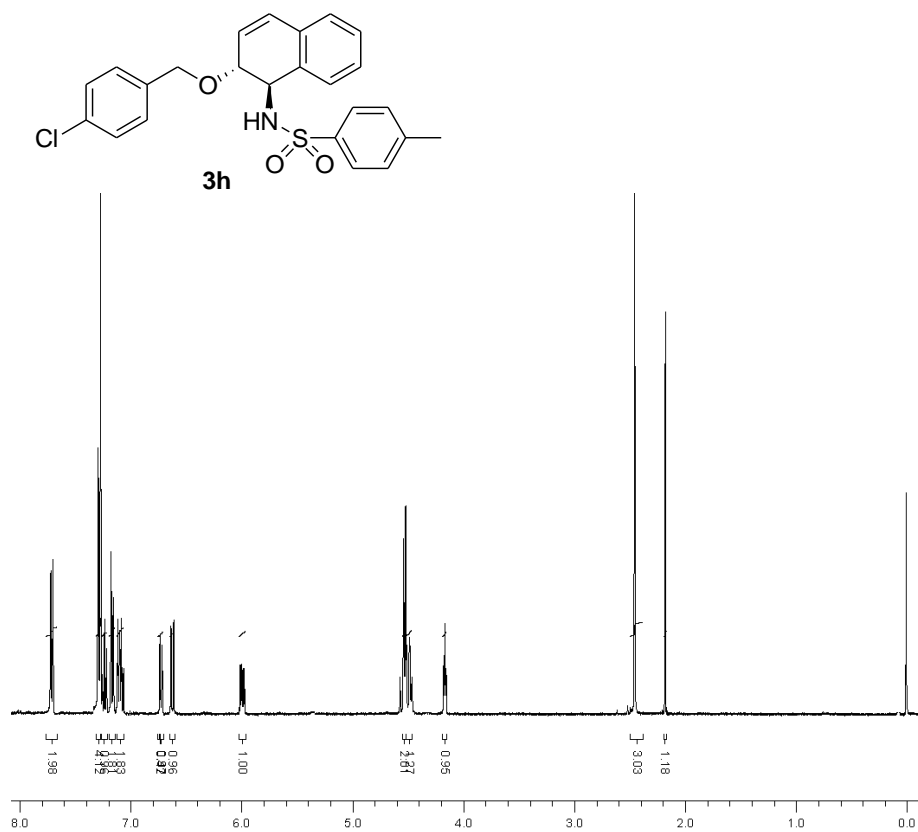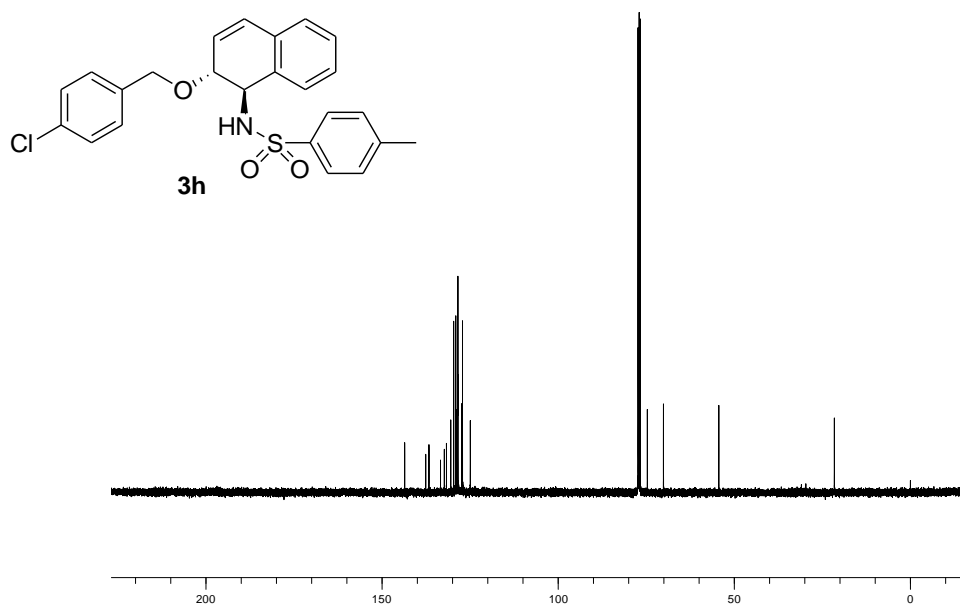

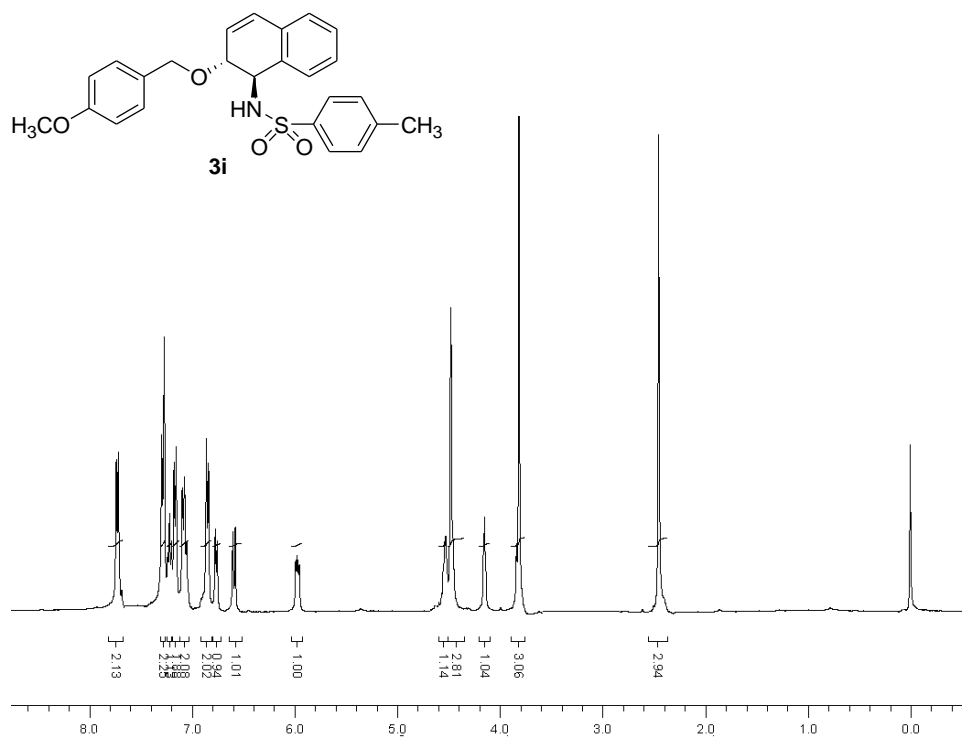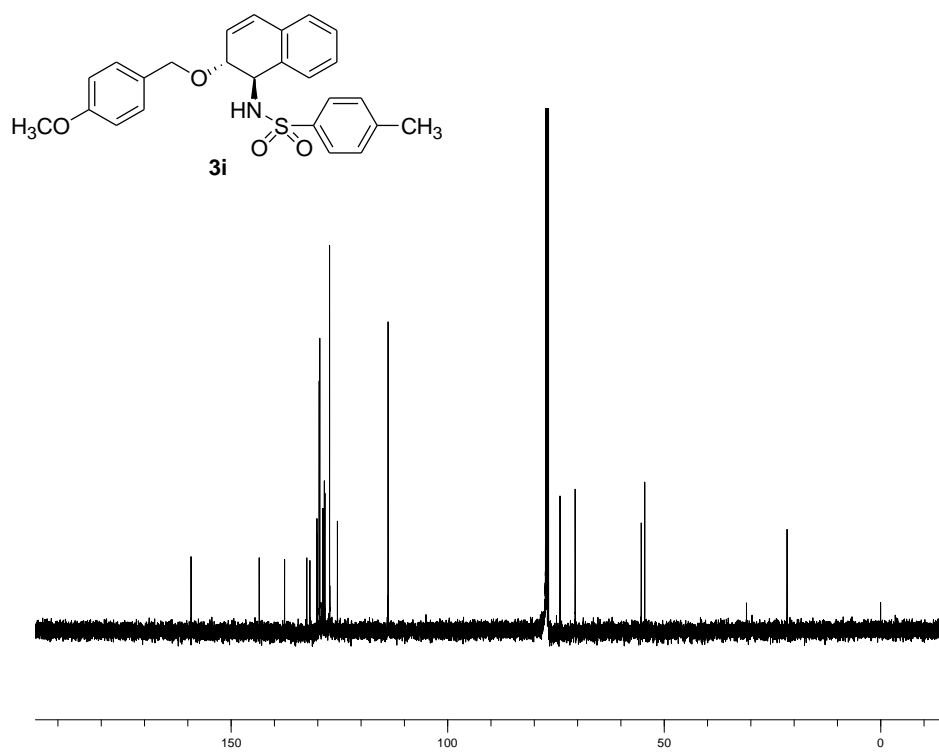



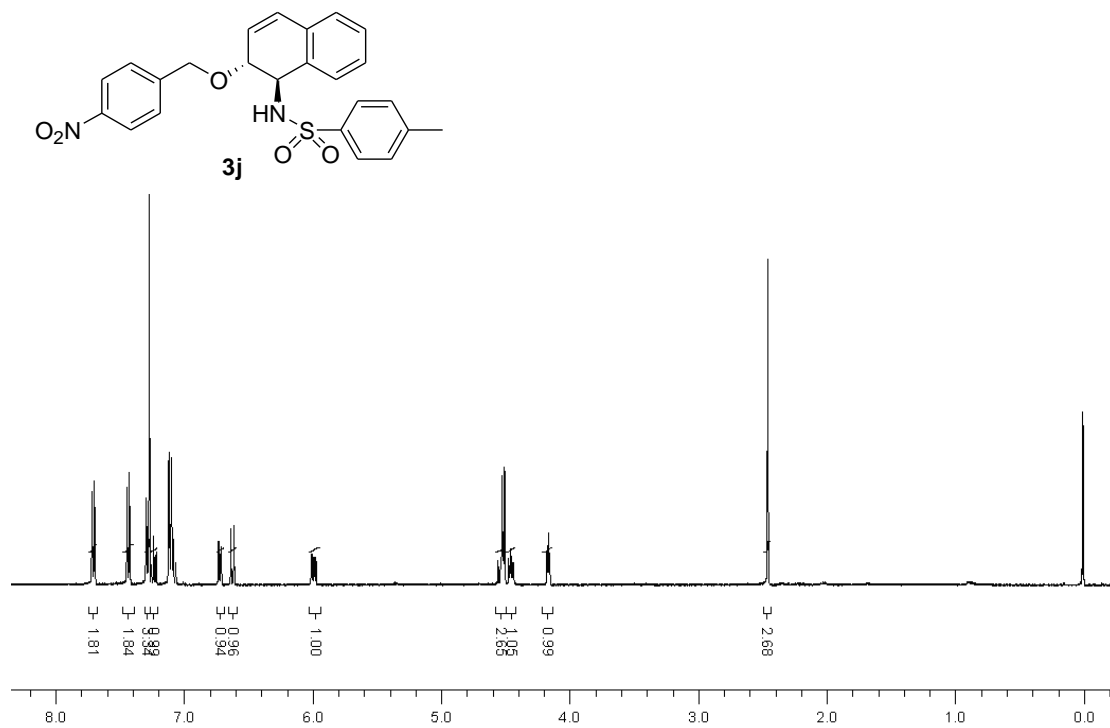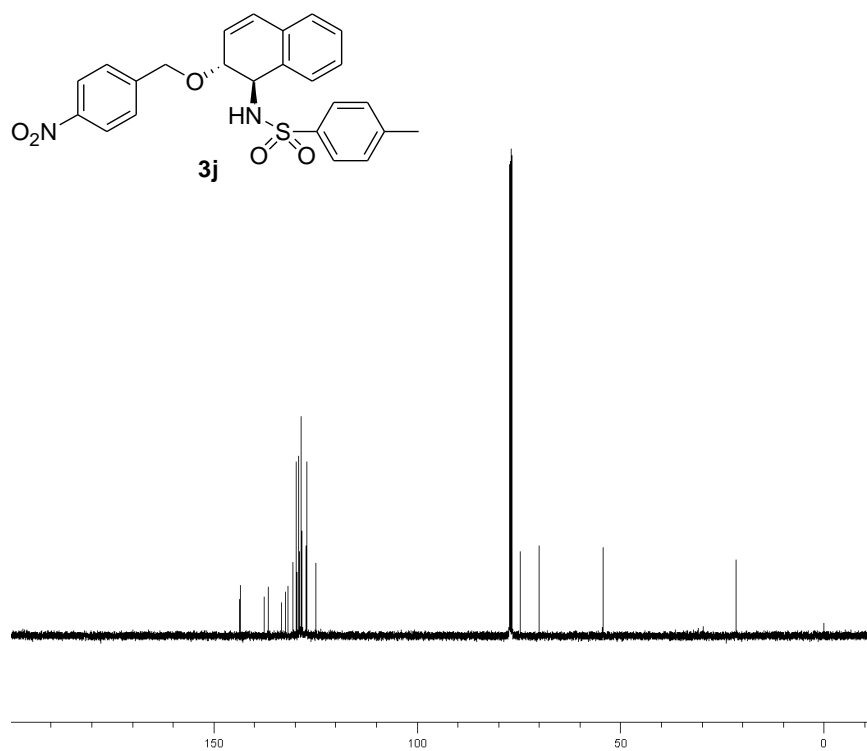

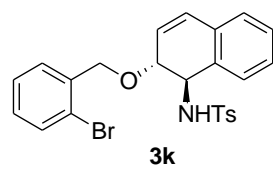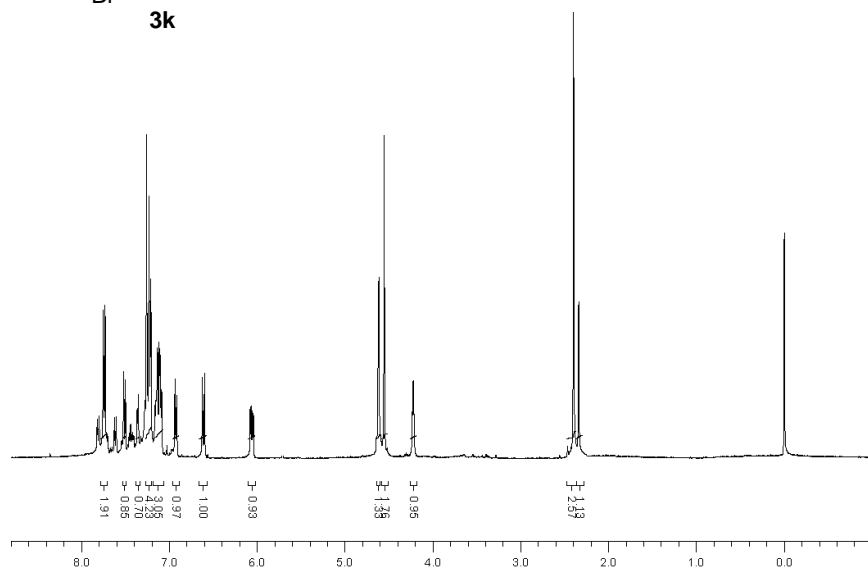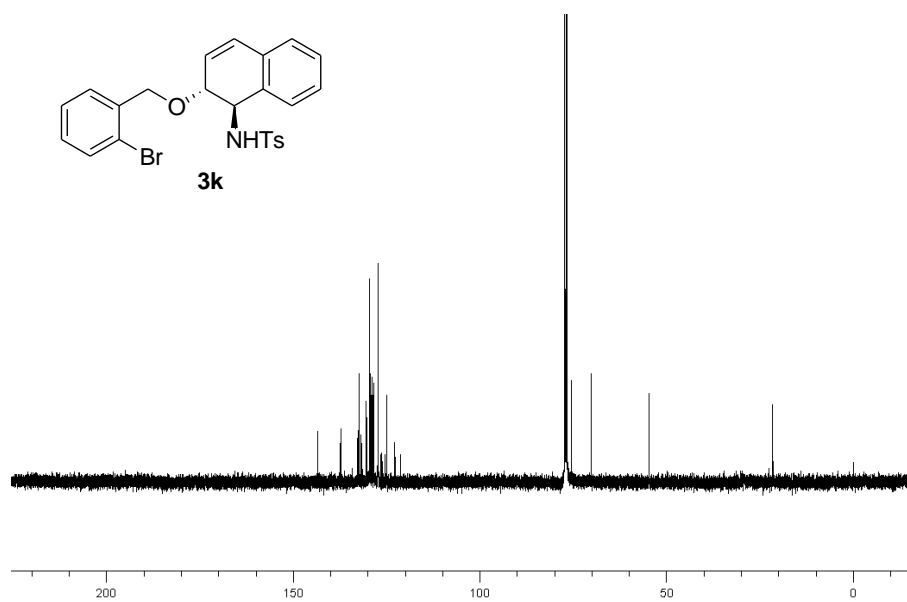

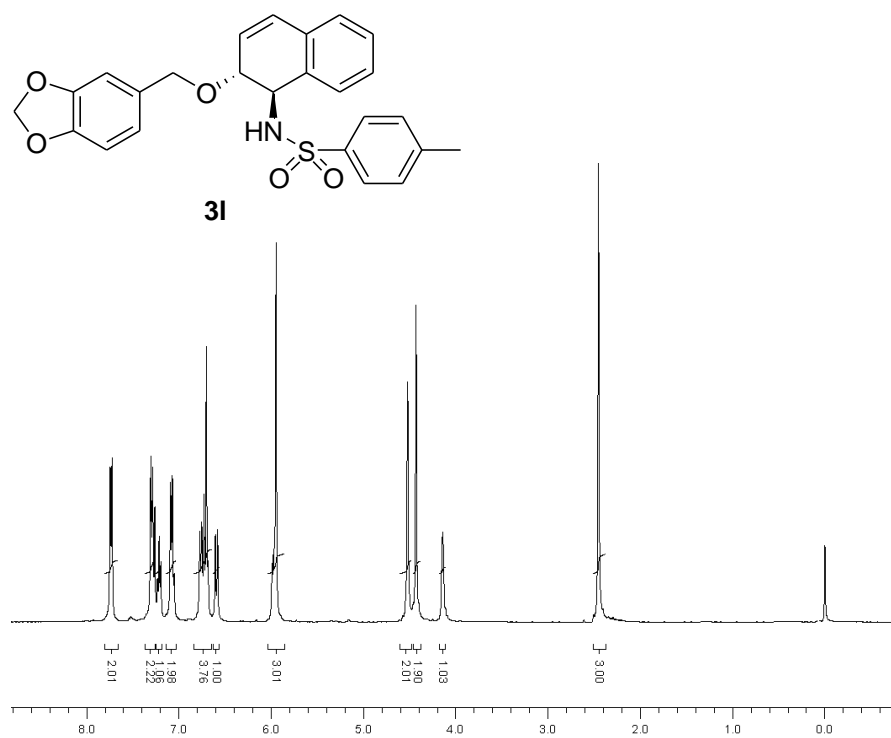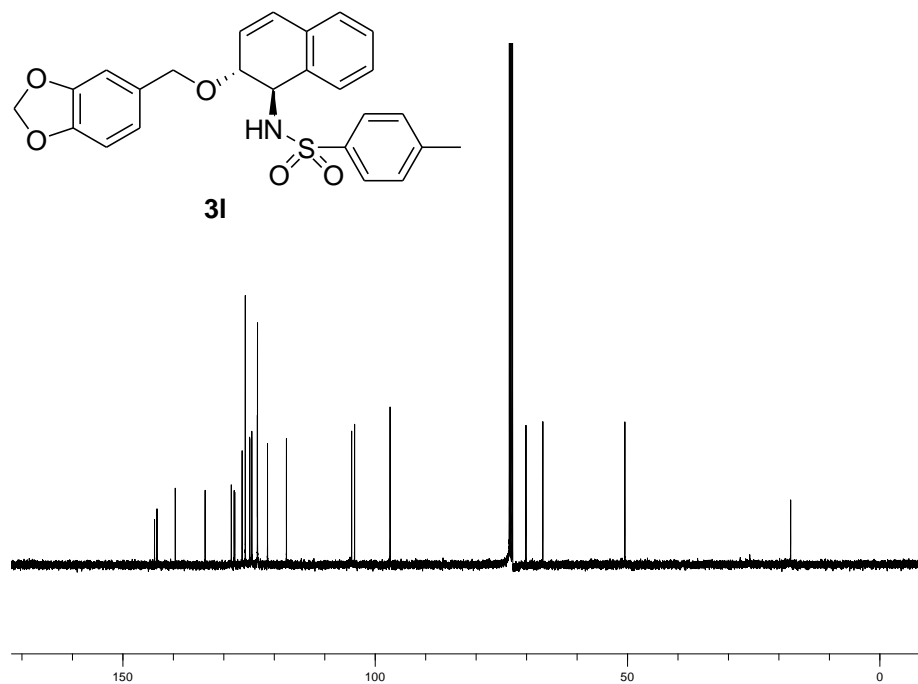

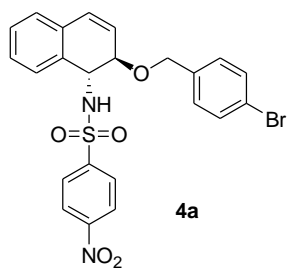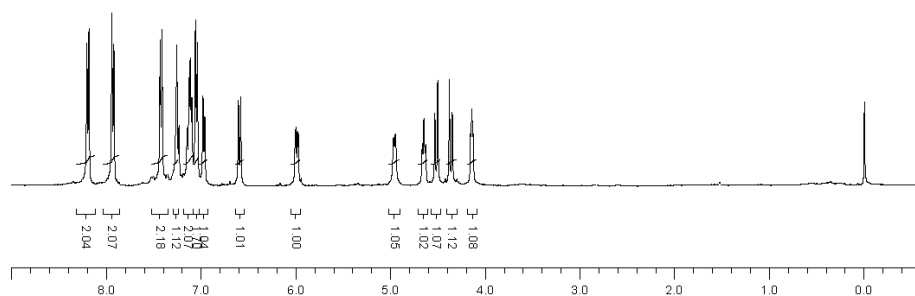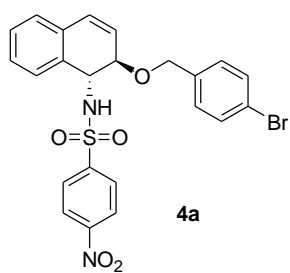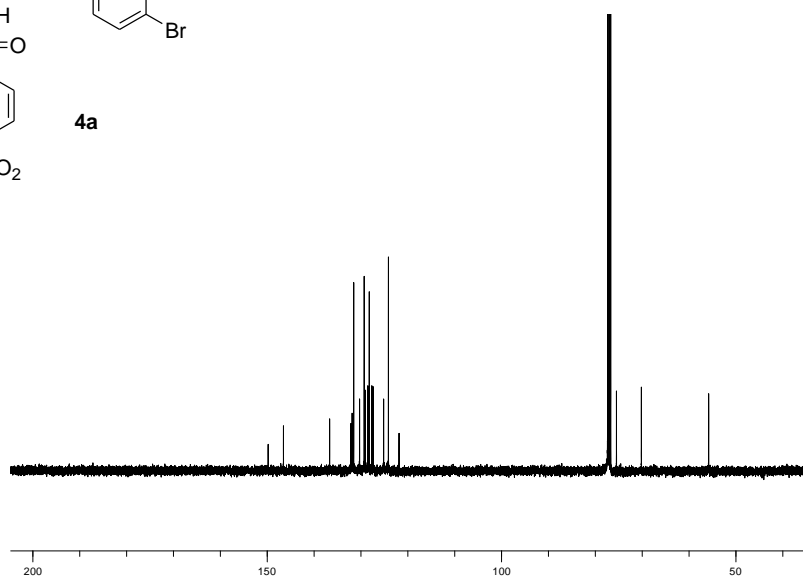

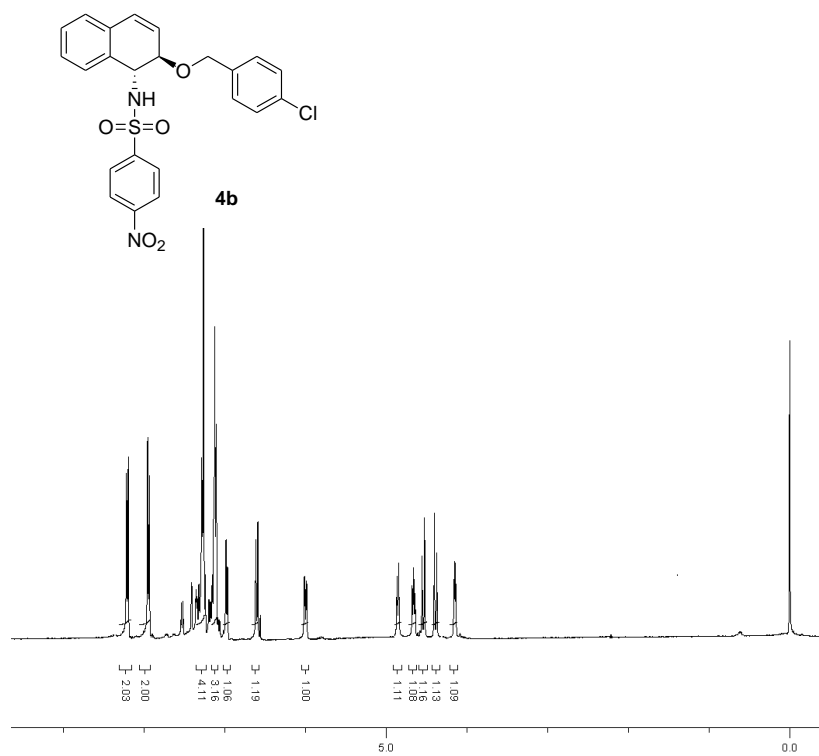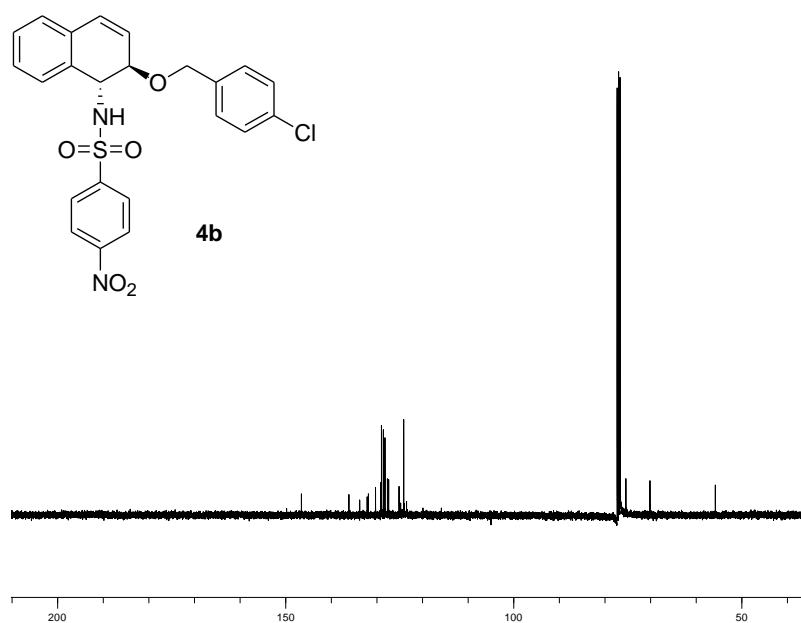

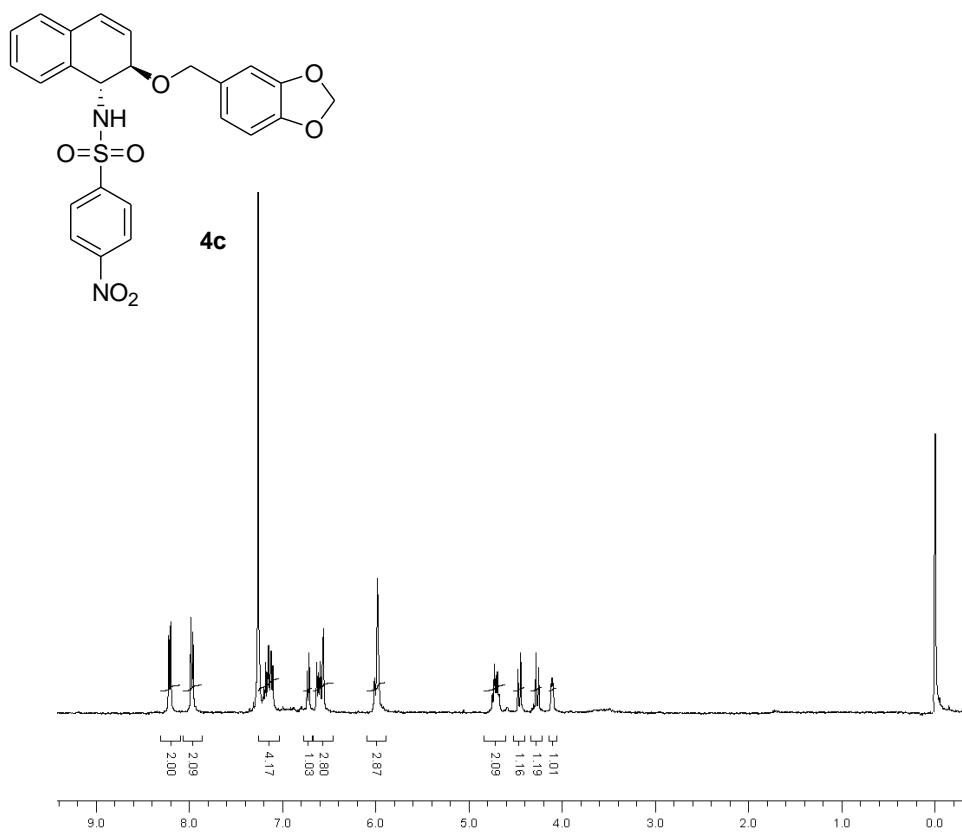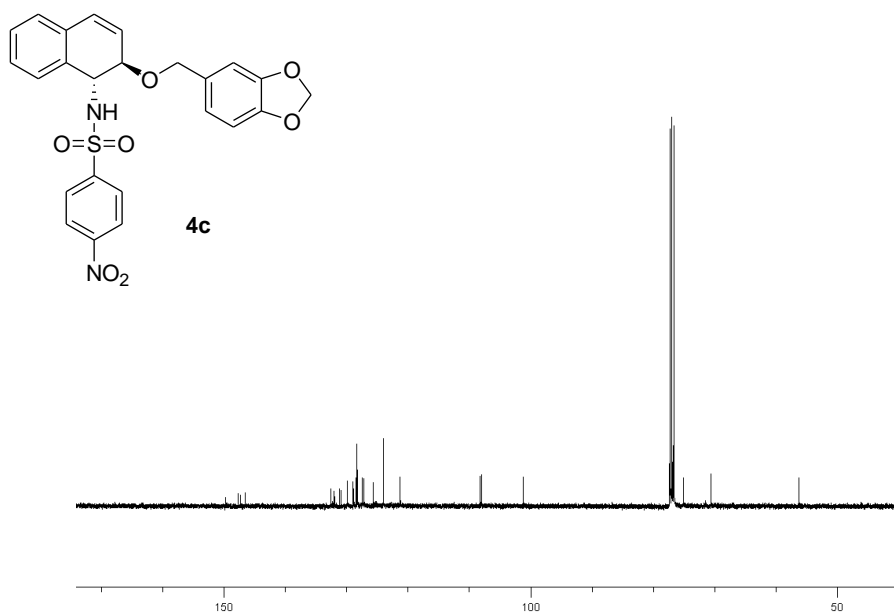

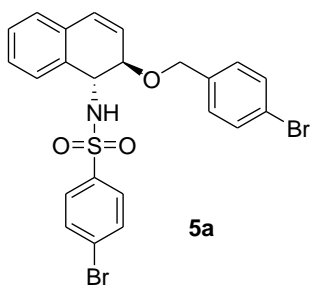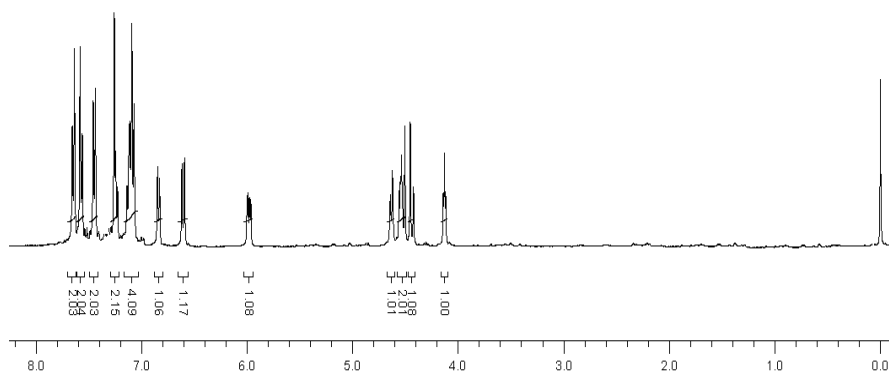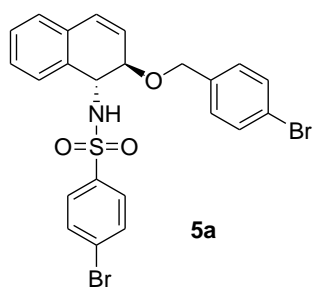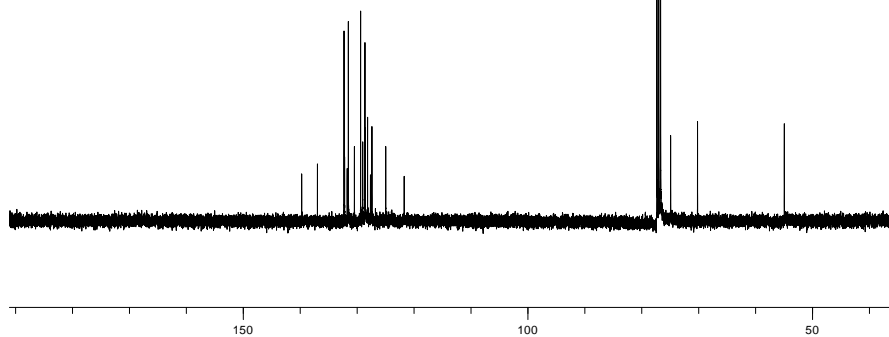

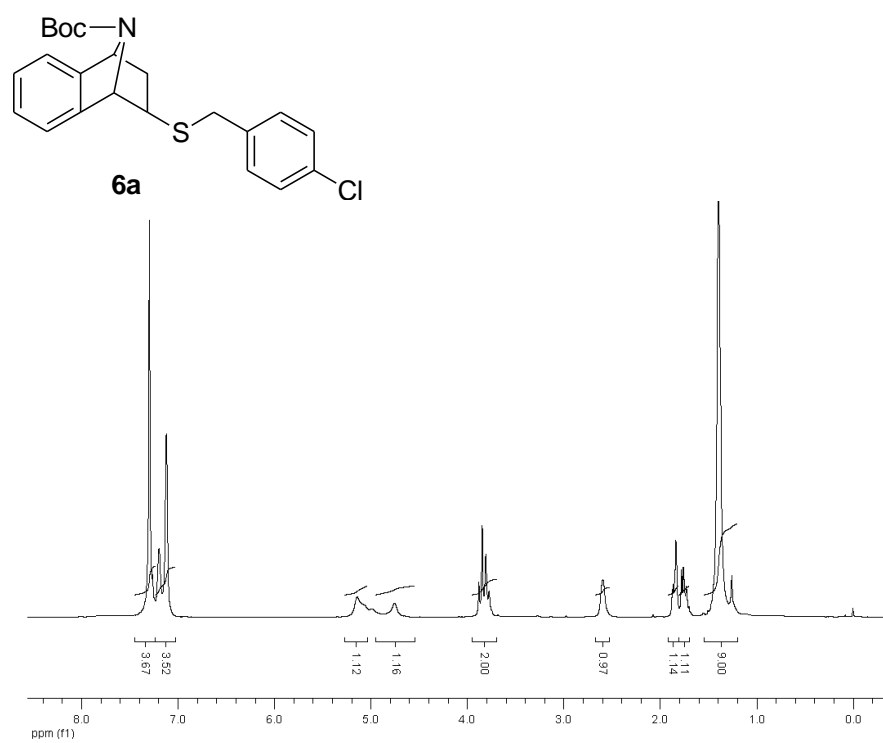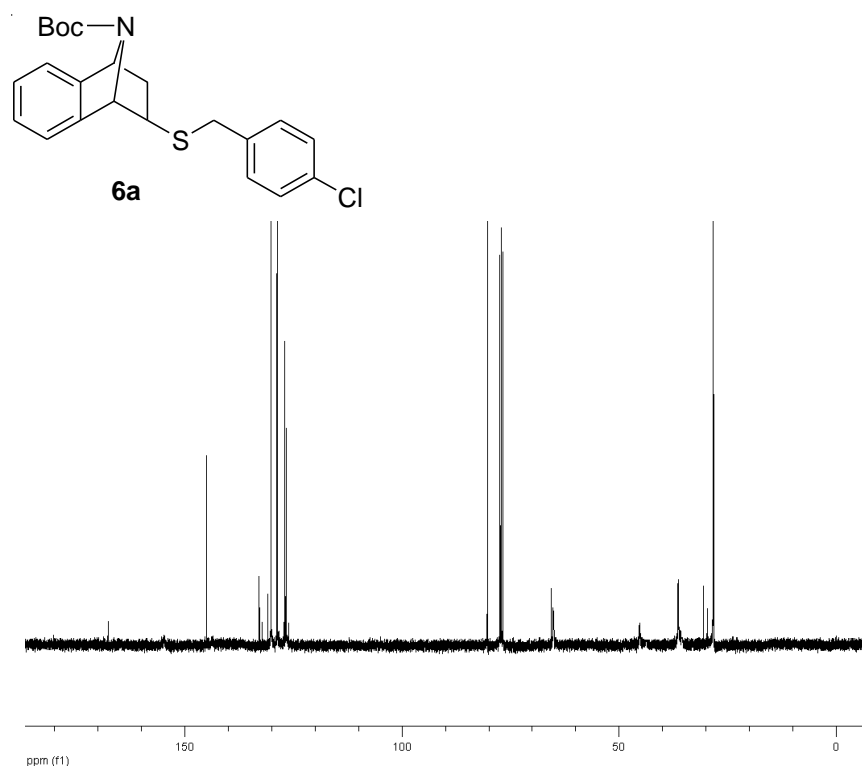



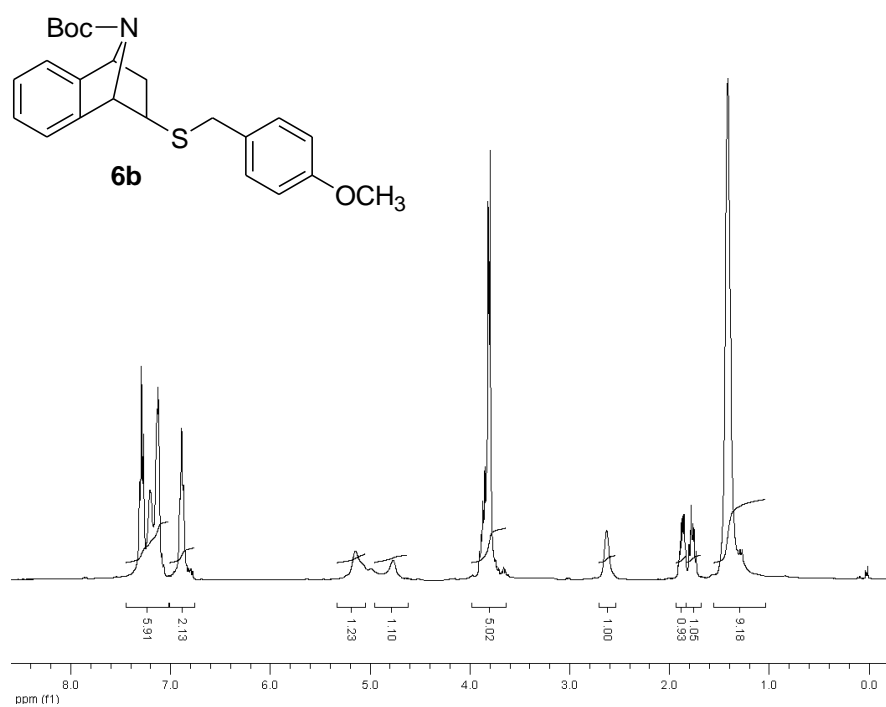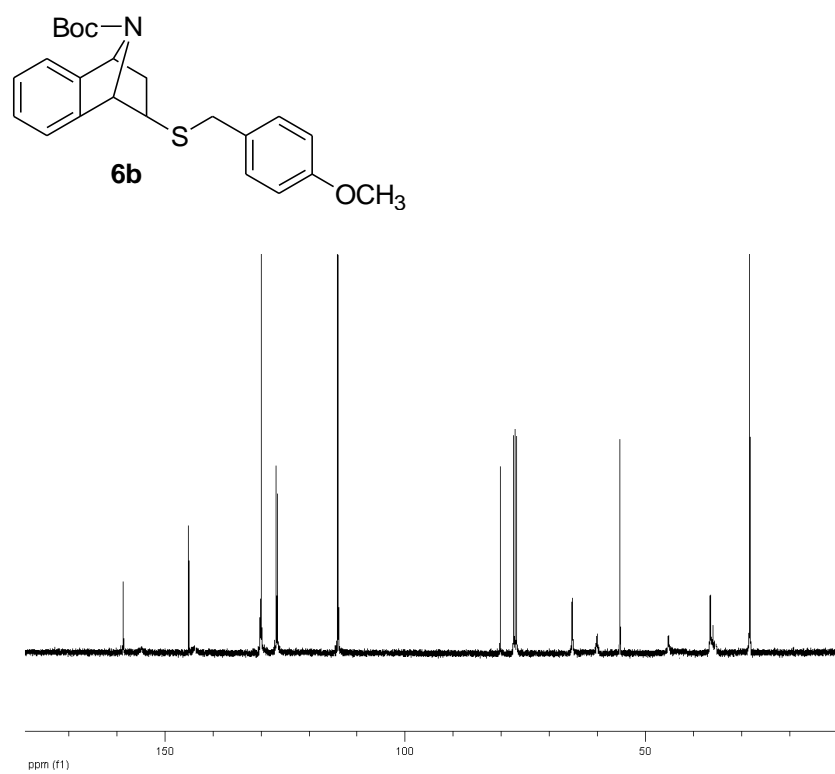

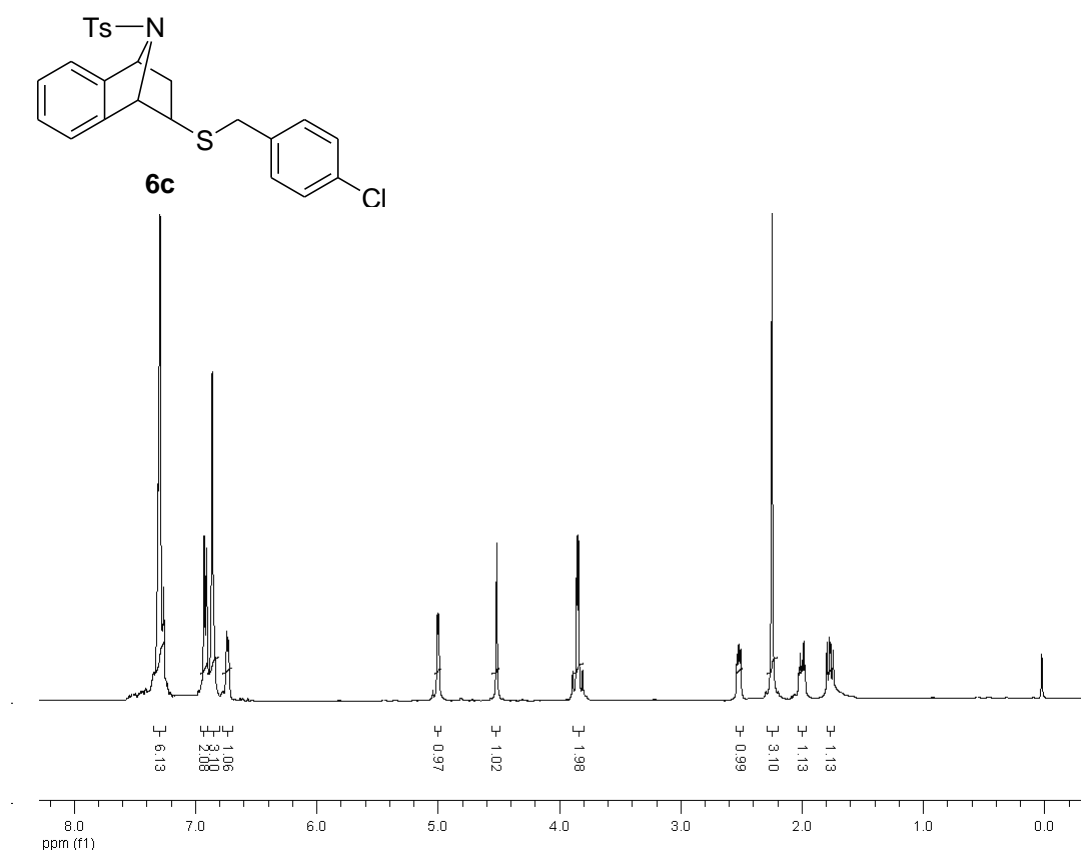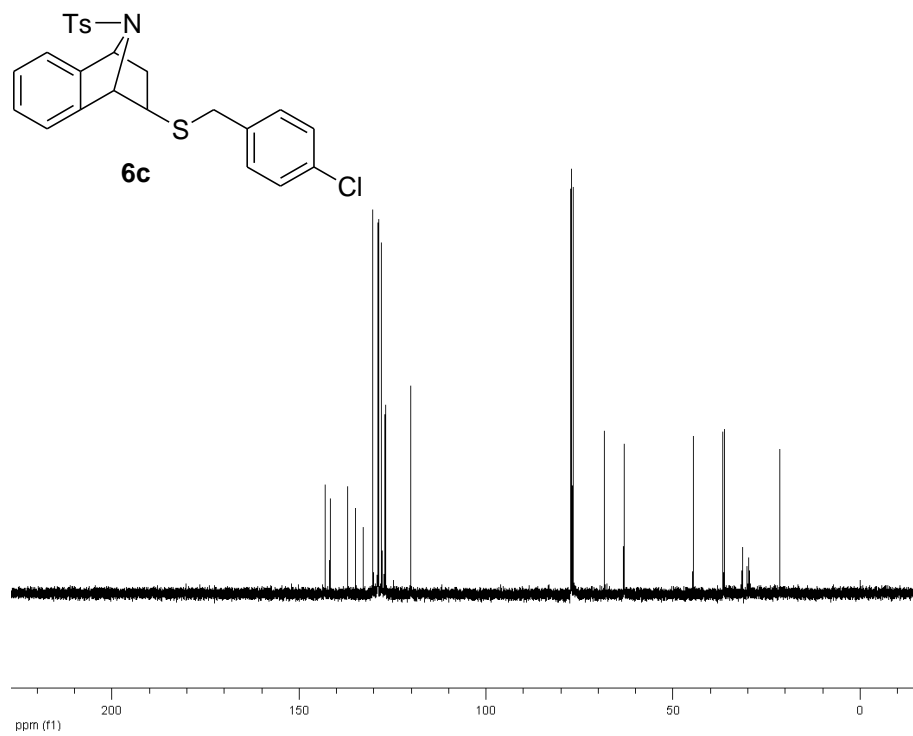

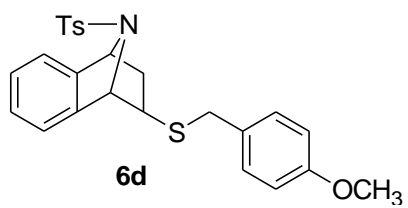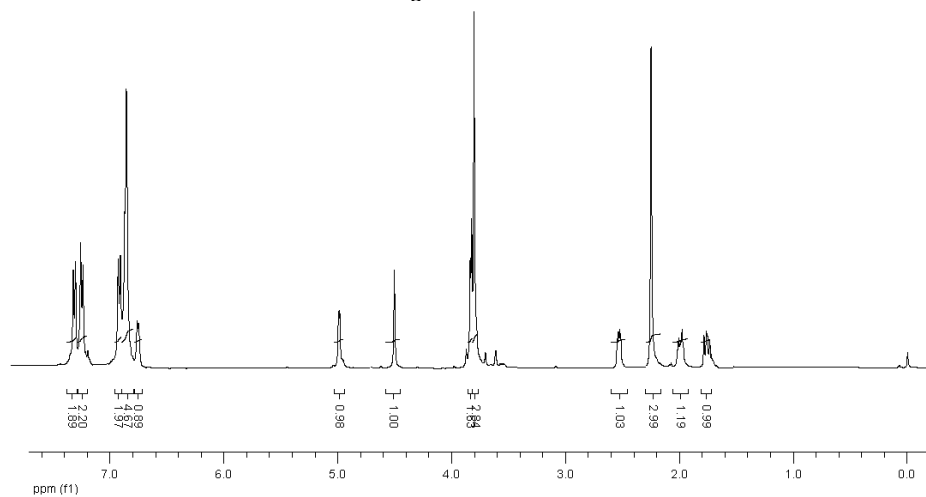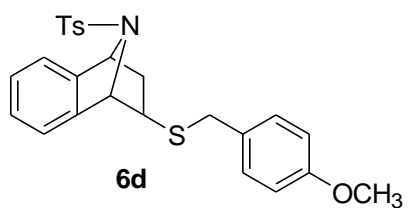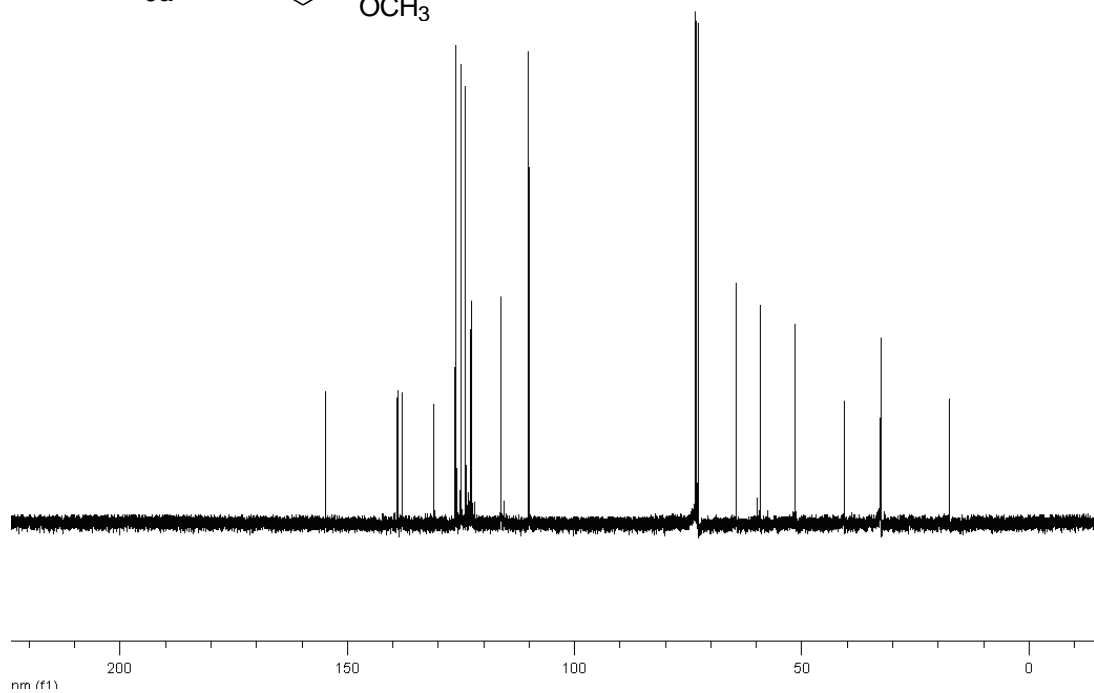

Supplement: c3ob40891d.pdf [file c3ob40891d.pdf]
